# Supplementary material
Source: HighWire-hosted journal article supplement (https://openheart.bmj.com/content/7/2/e001294)

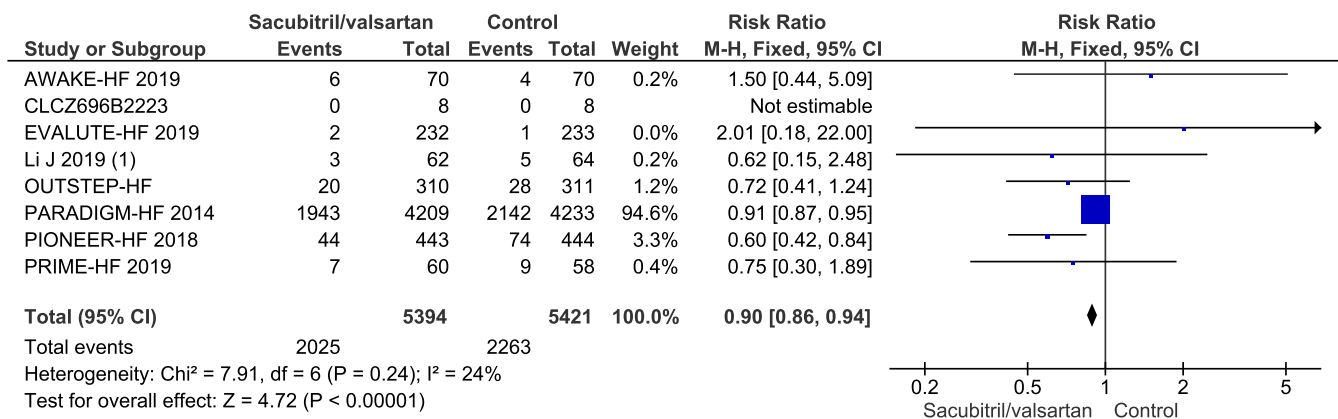

Supplement: inline-supplementary-material-11 [file inline-supplementary-material-11.pdf]

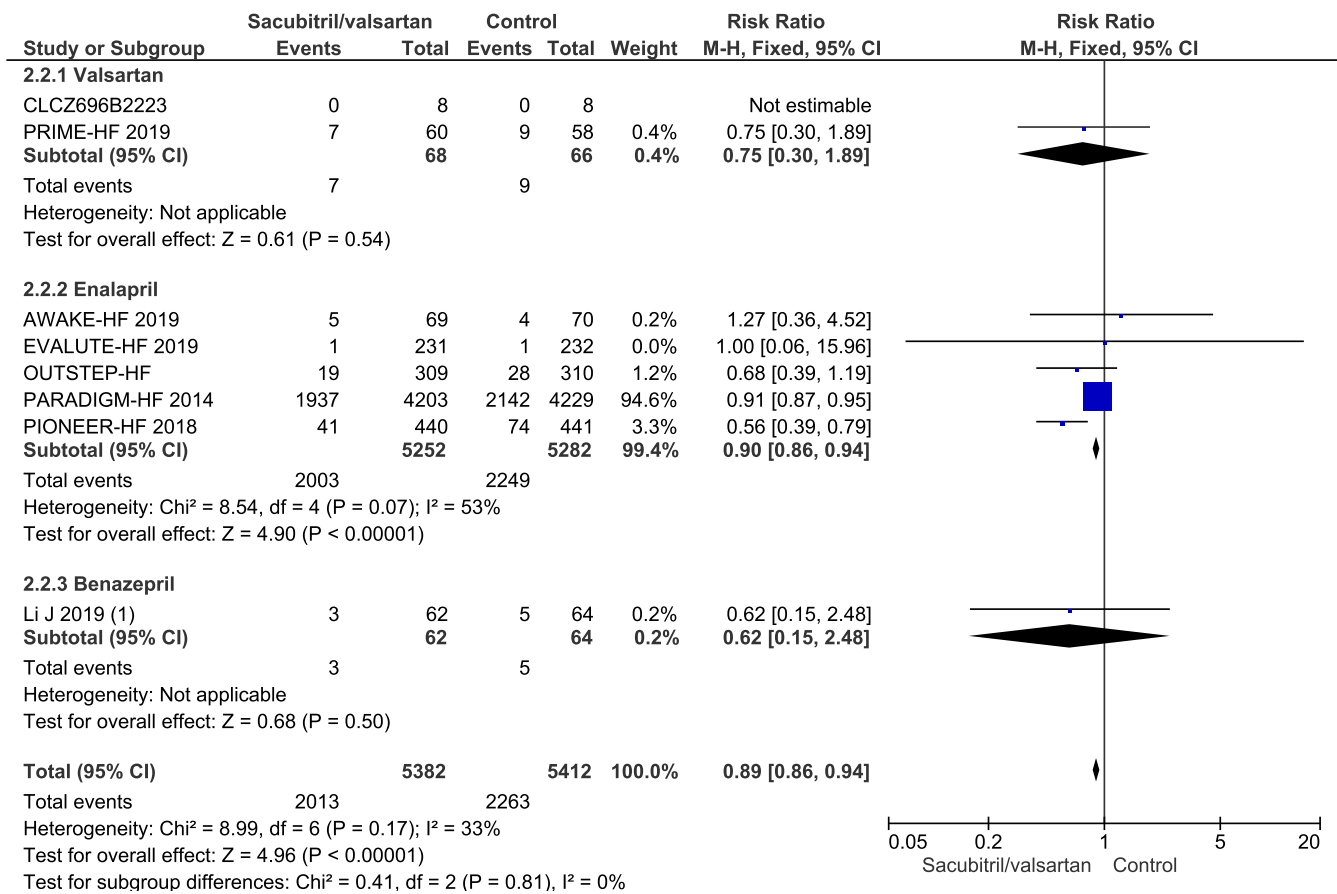

Supplement: inline-supplementary-material-12 [file inline-supplementary-material-12.pdf]

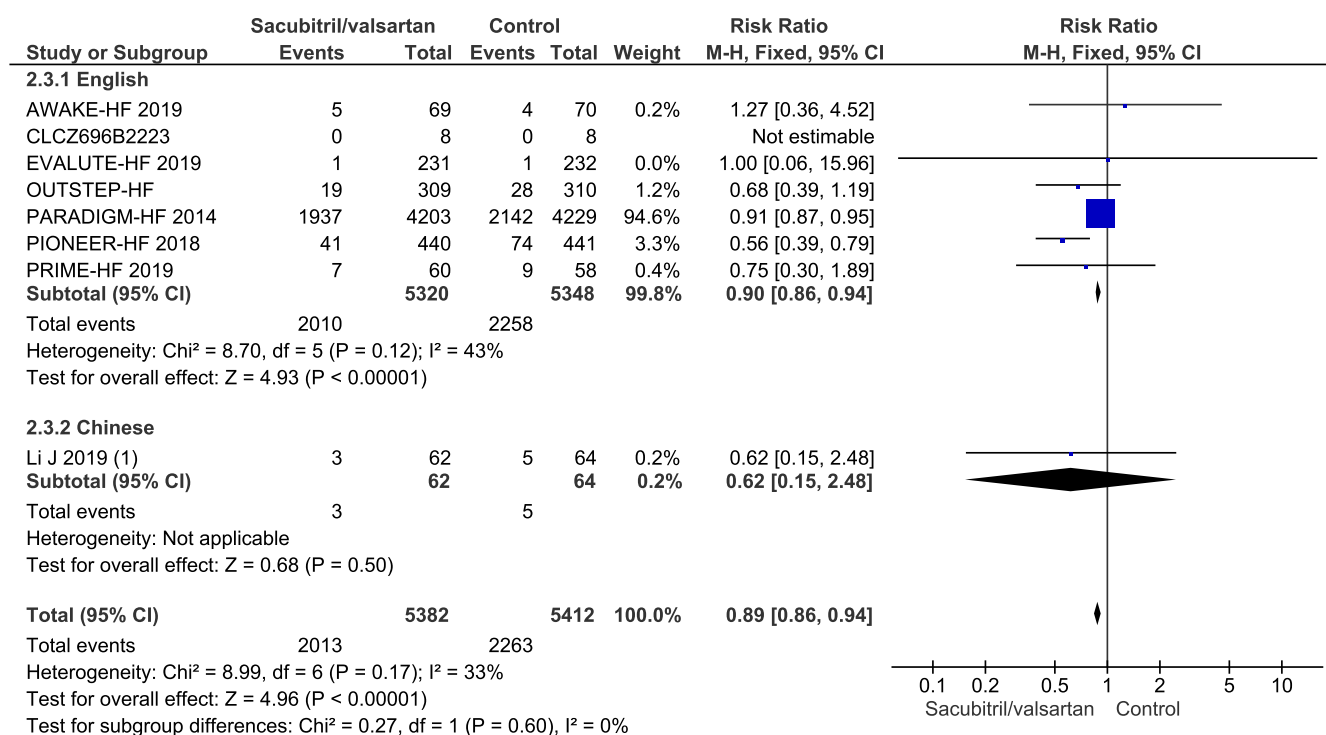

Supplement: inline-supplementary-material-13 [file inline-supplementary-material-13.pdf]

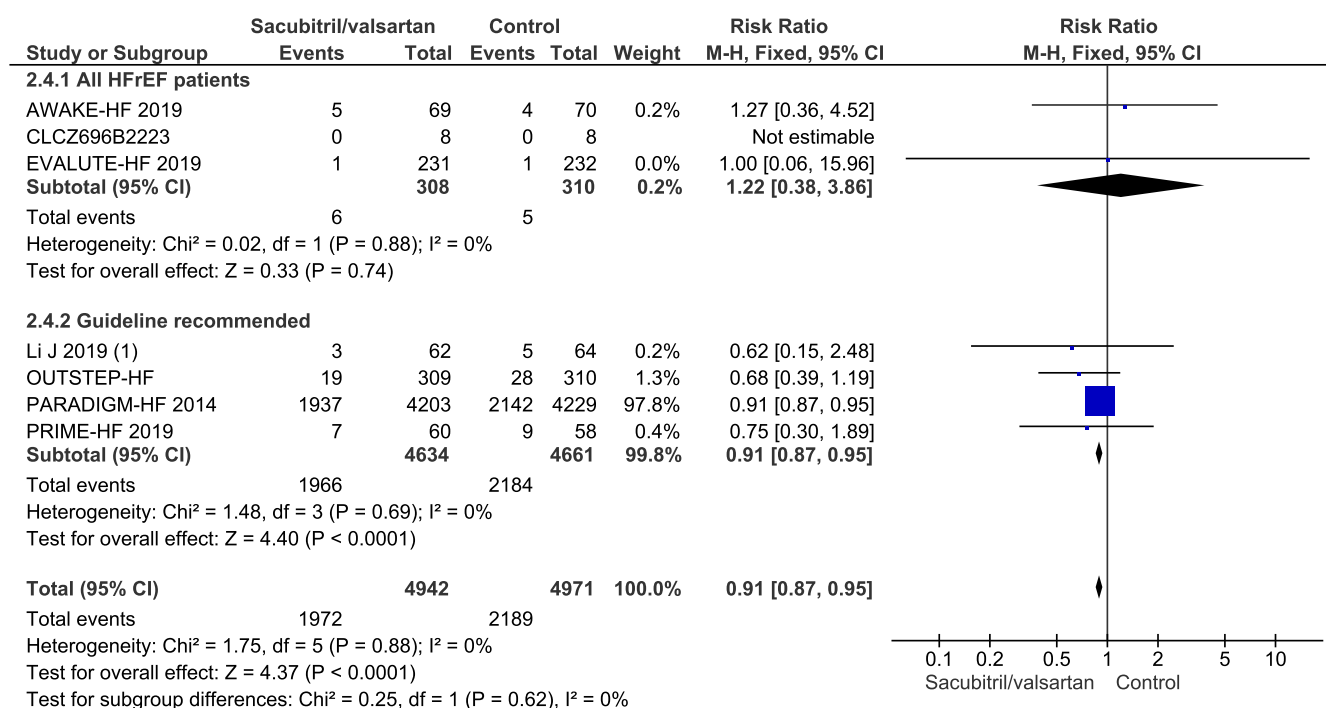

Supplement: inline-supplementary-material-14 [file inline-supplementary-material-14.pdf]

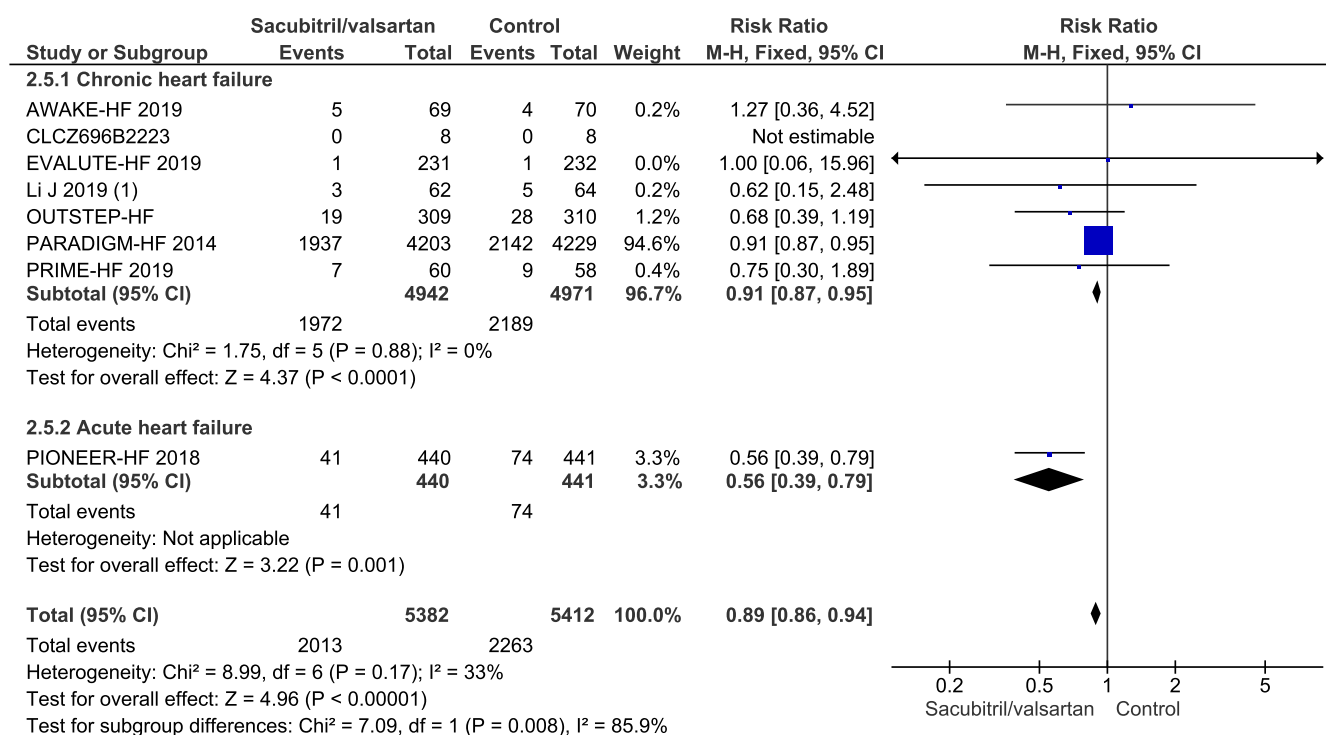

Supplement: inline-supplementary-material-15 [file inline-supplementary-material-15.pdf]

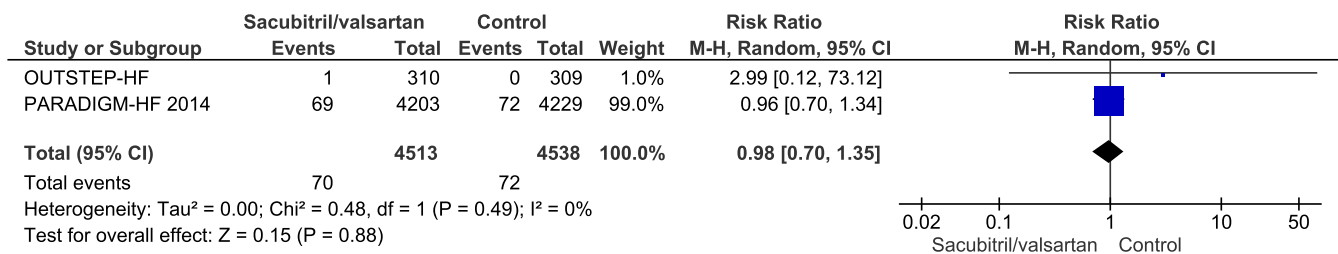

Supplement: inline-supplementary-material-16 [file inline-supplementary-material-16.pdf]

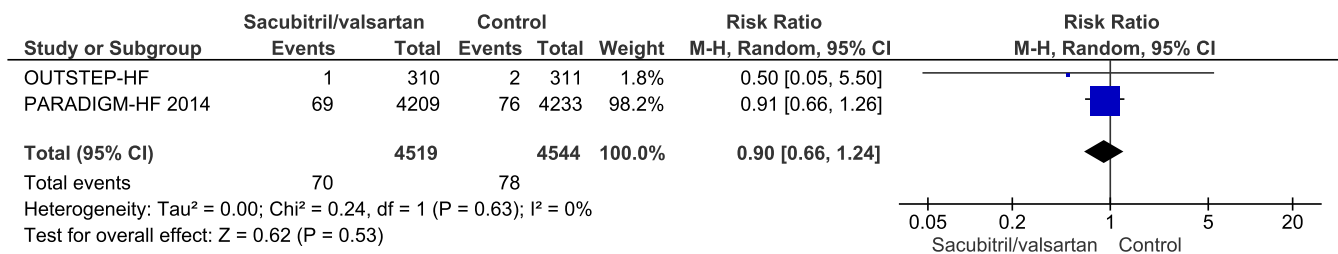

Supplement: inline-supplementary-material-18 [file inline-supplementary-material-18.pdf]

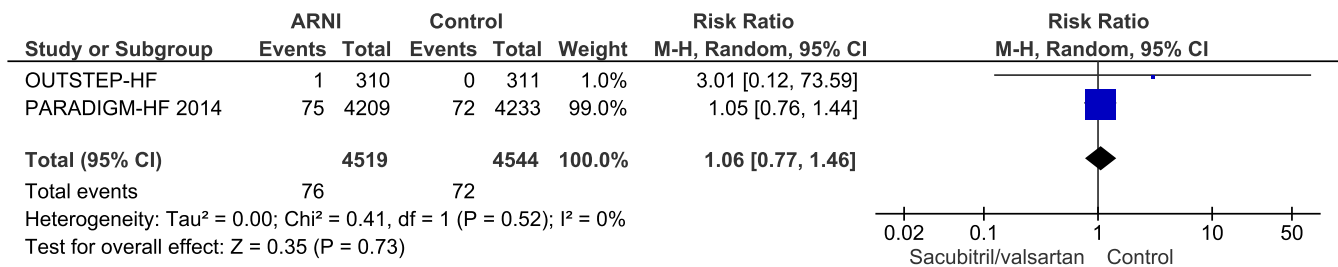

Supplement: inline-supplementary-material-19 [file inline-supplementary-material-19.pdf]

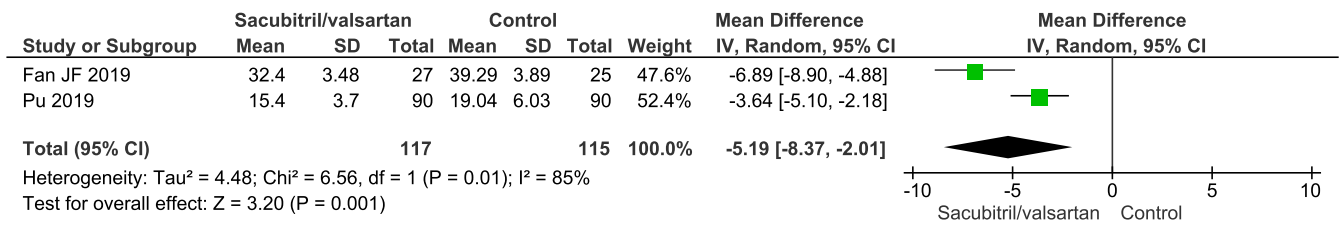

Supplement: inline-supplementary-material-20 [file inline-supplementary-material-20.pdf]

DARIS; MD 5; variance 21.1; alpha 5%; beta 10%; diversity 86.18 is a Two-sided graph

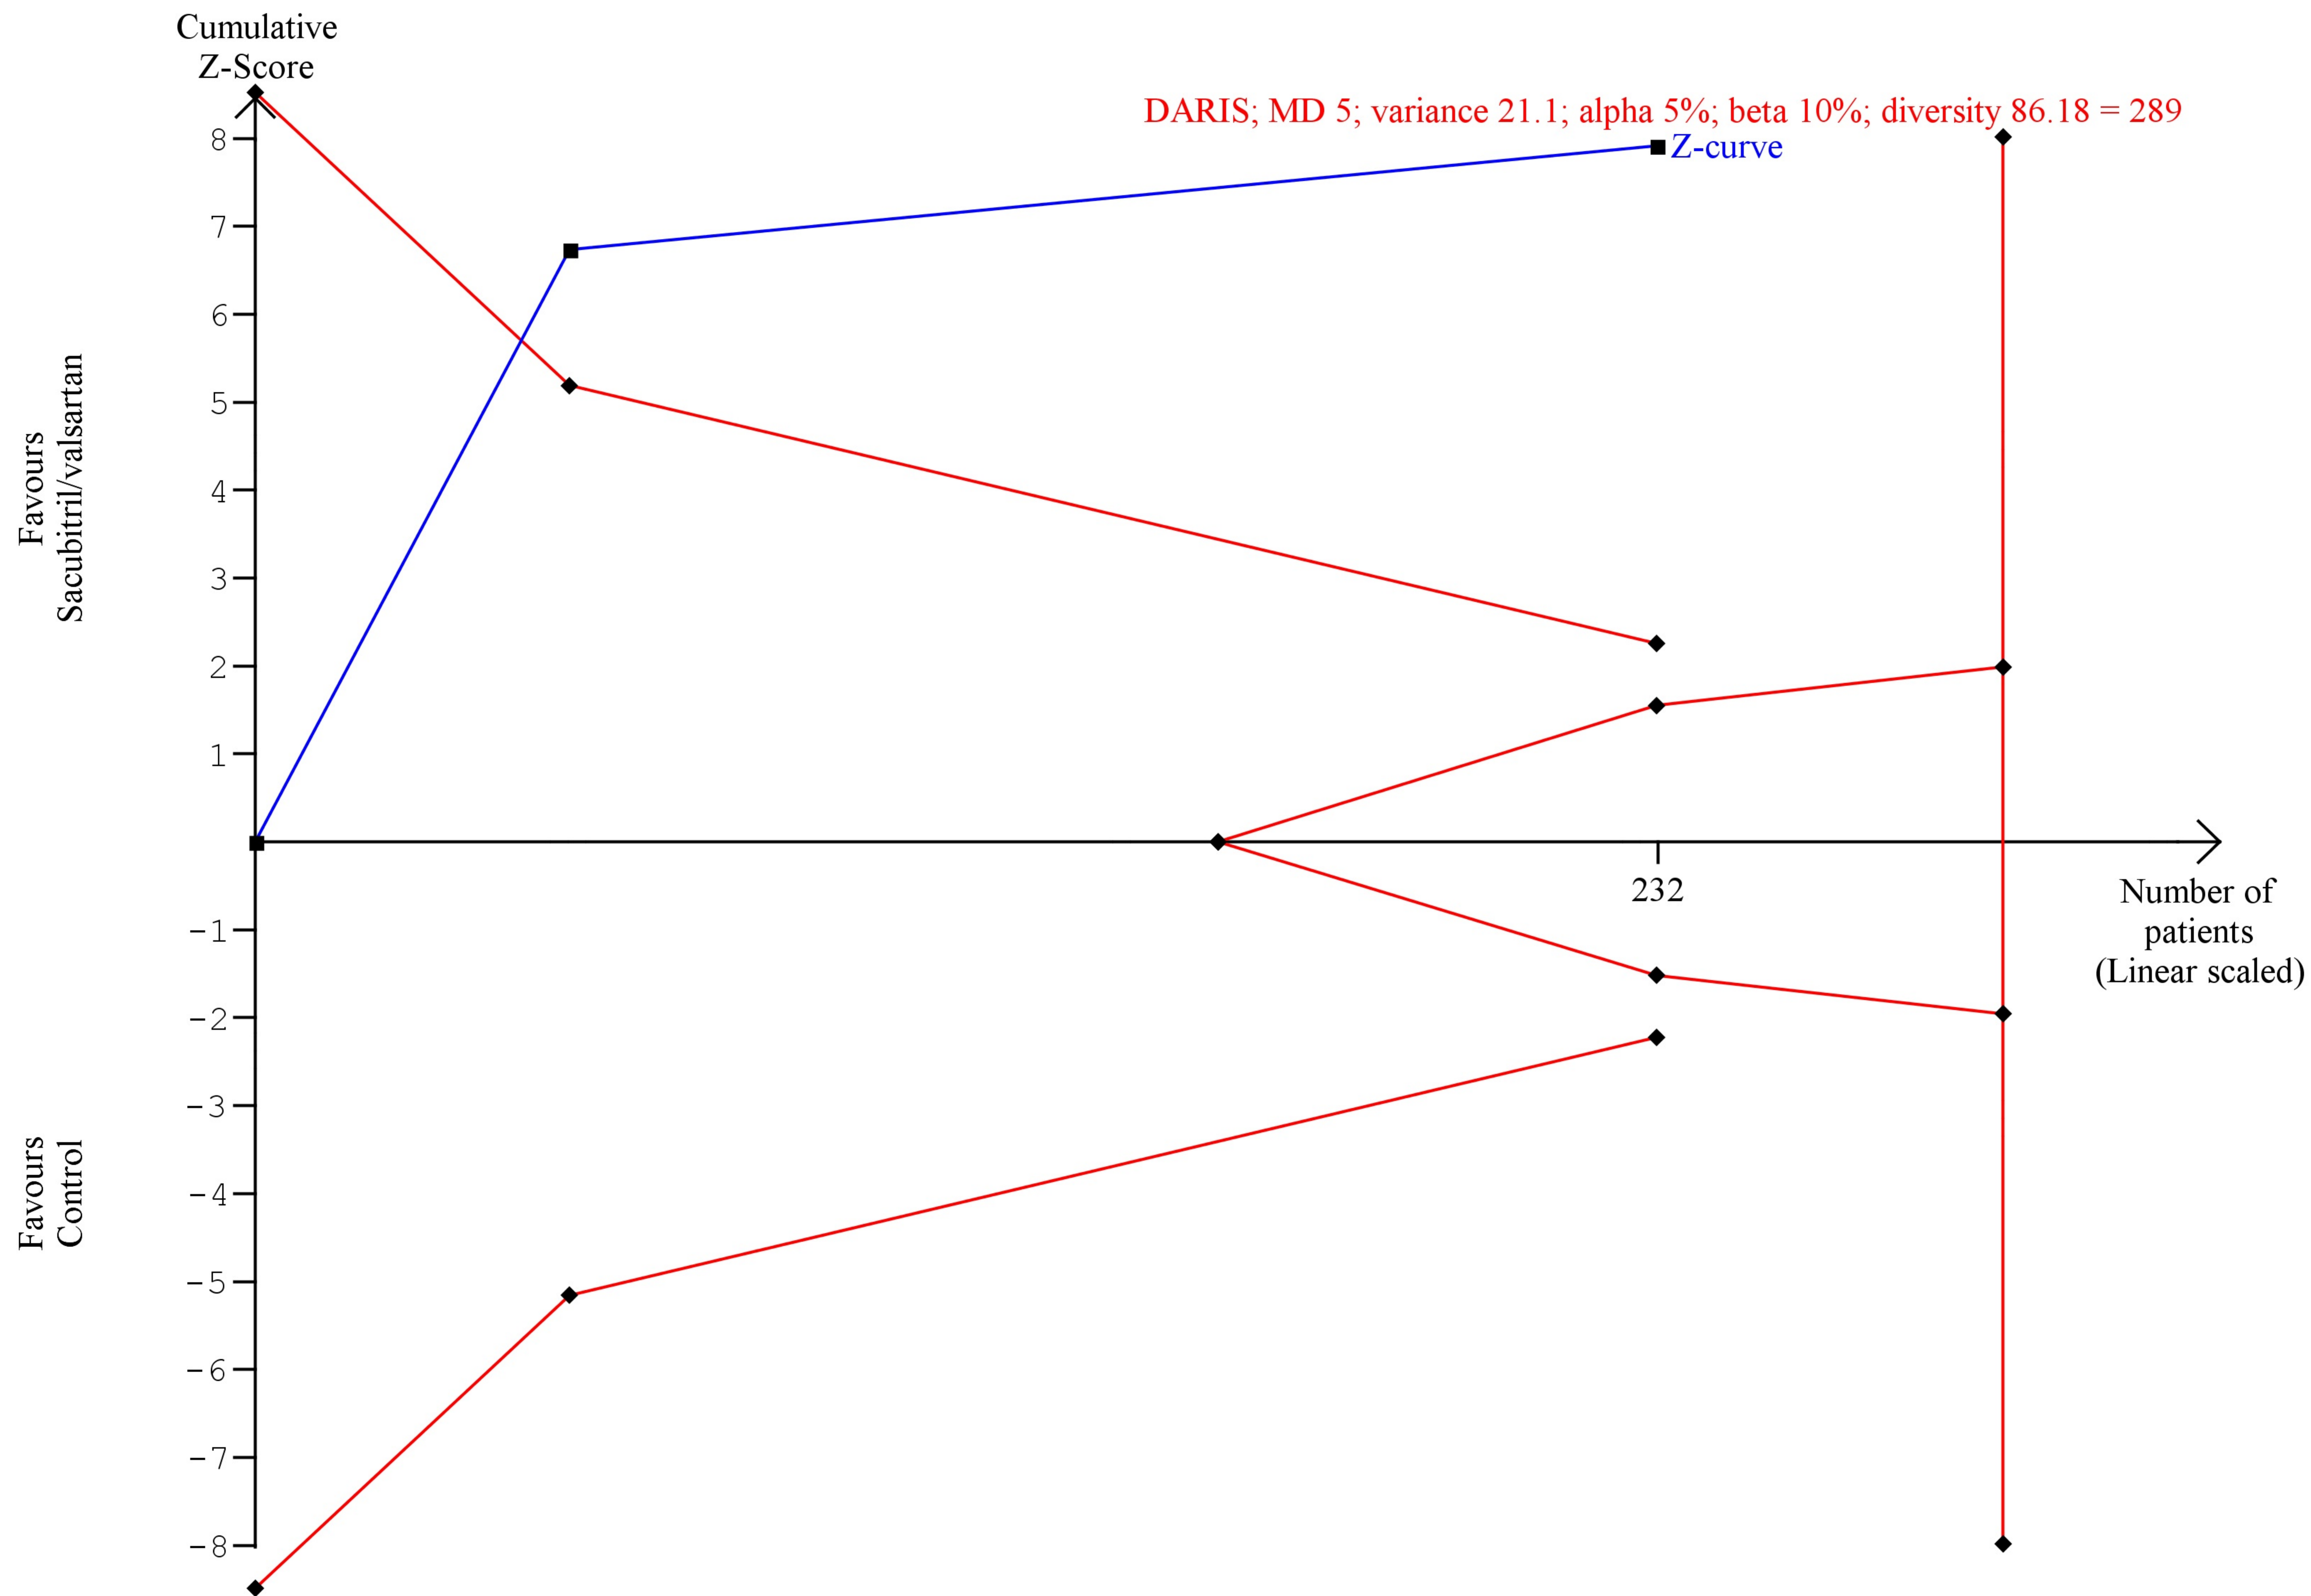

Supplement: inline-supplementary-material-21 [file inline-supplementary-material-21.pdf]

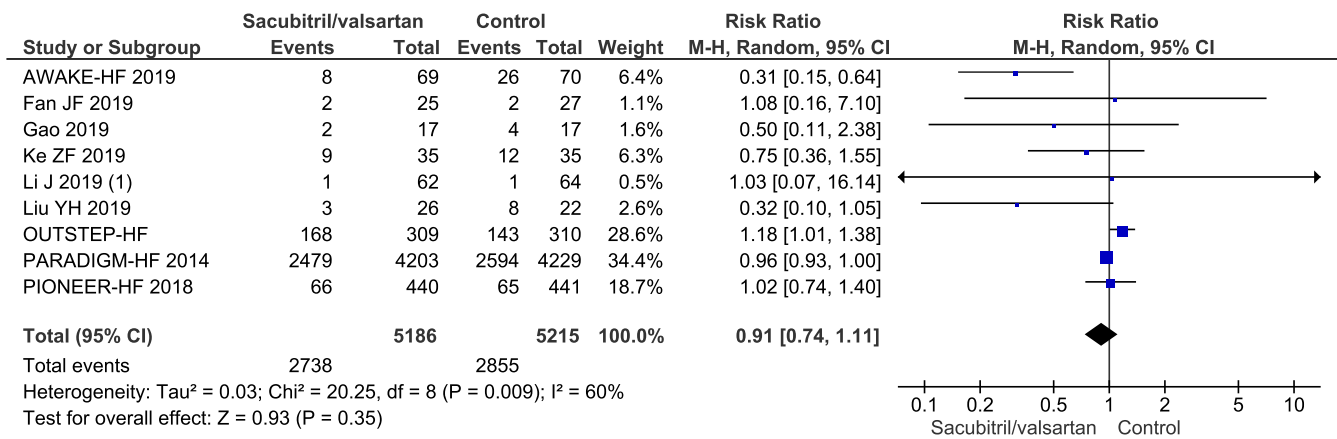

Supplement: inline-supplementary-material-22 [file inline-supplementary-material-22.pdf]

DARIS; RR 15%; Pc 54.7%; alpha 5%; beta 10%; Diversity 92% is a Two-sided graph

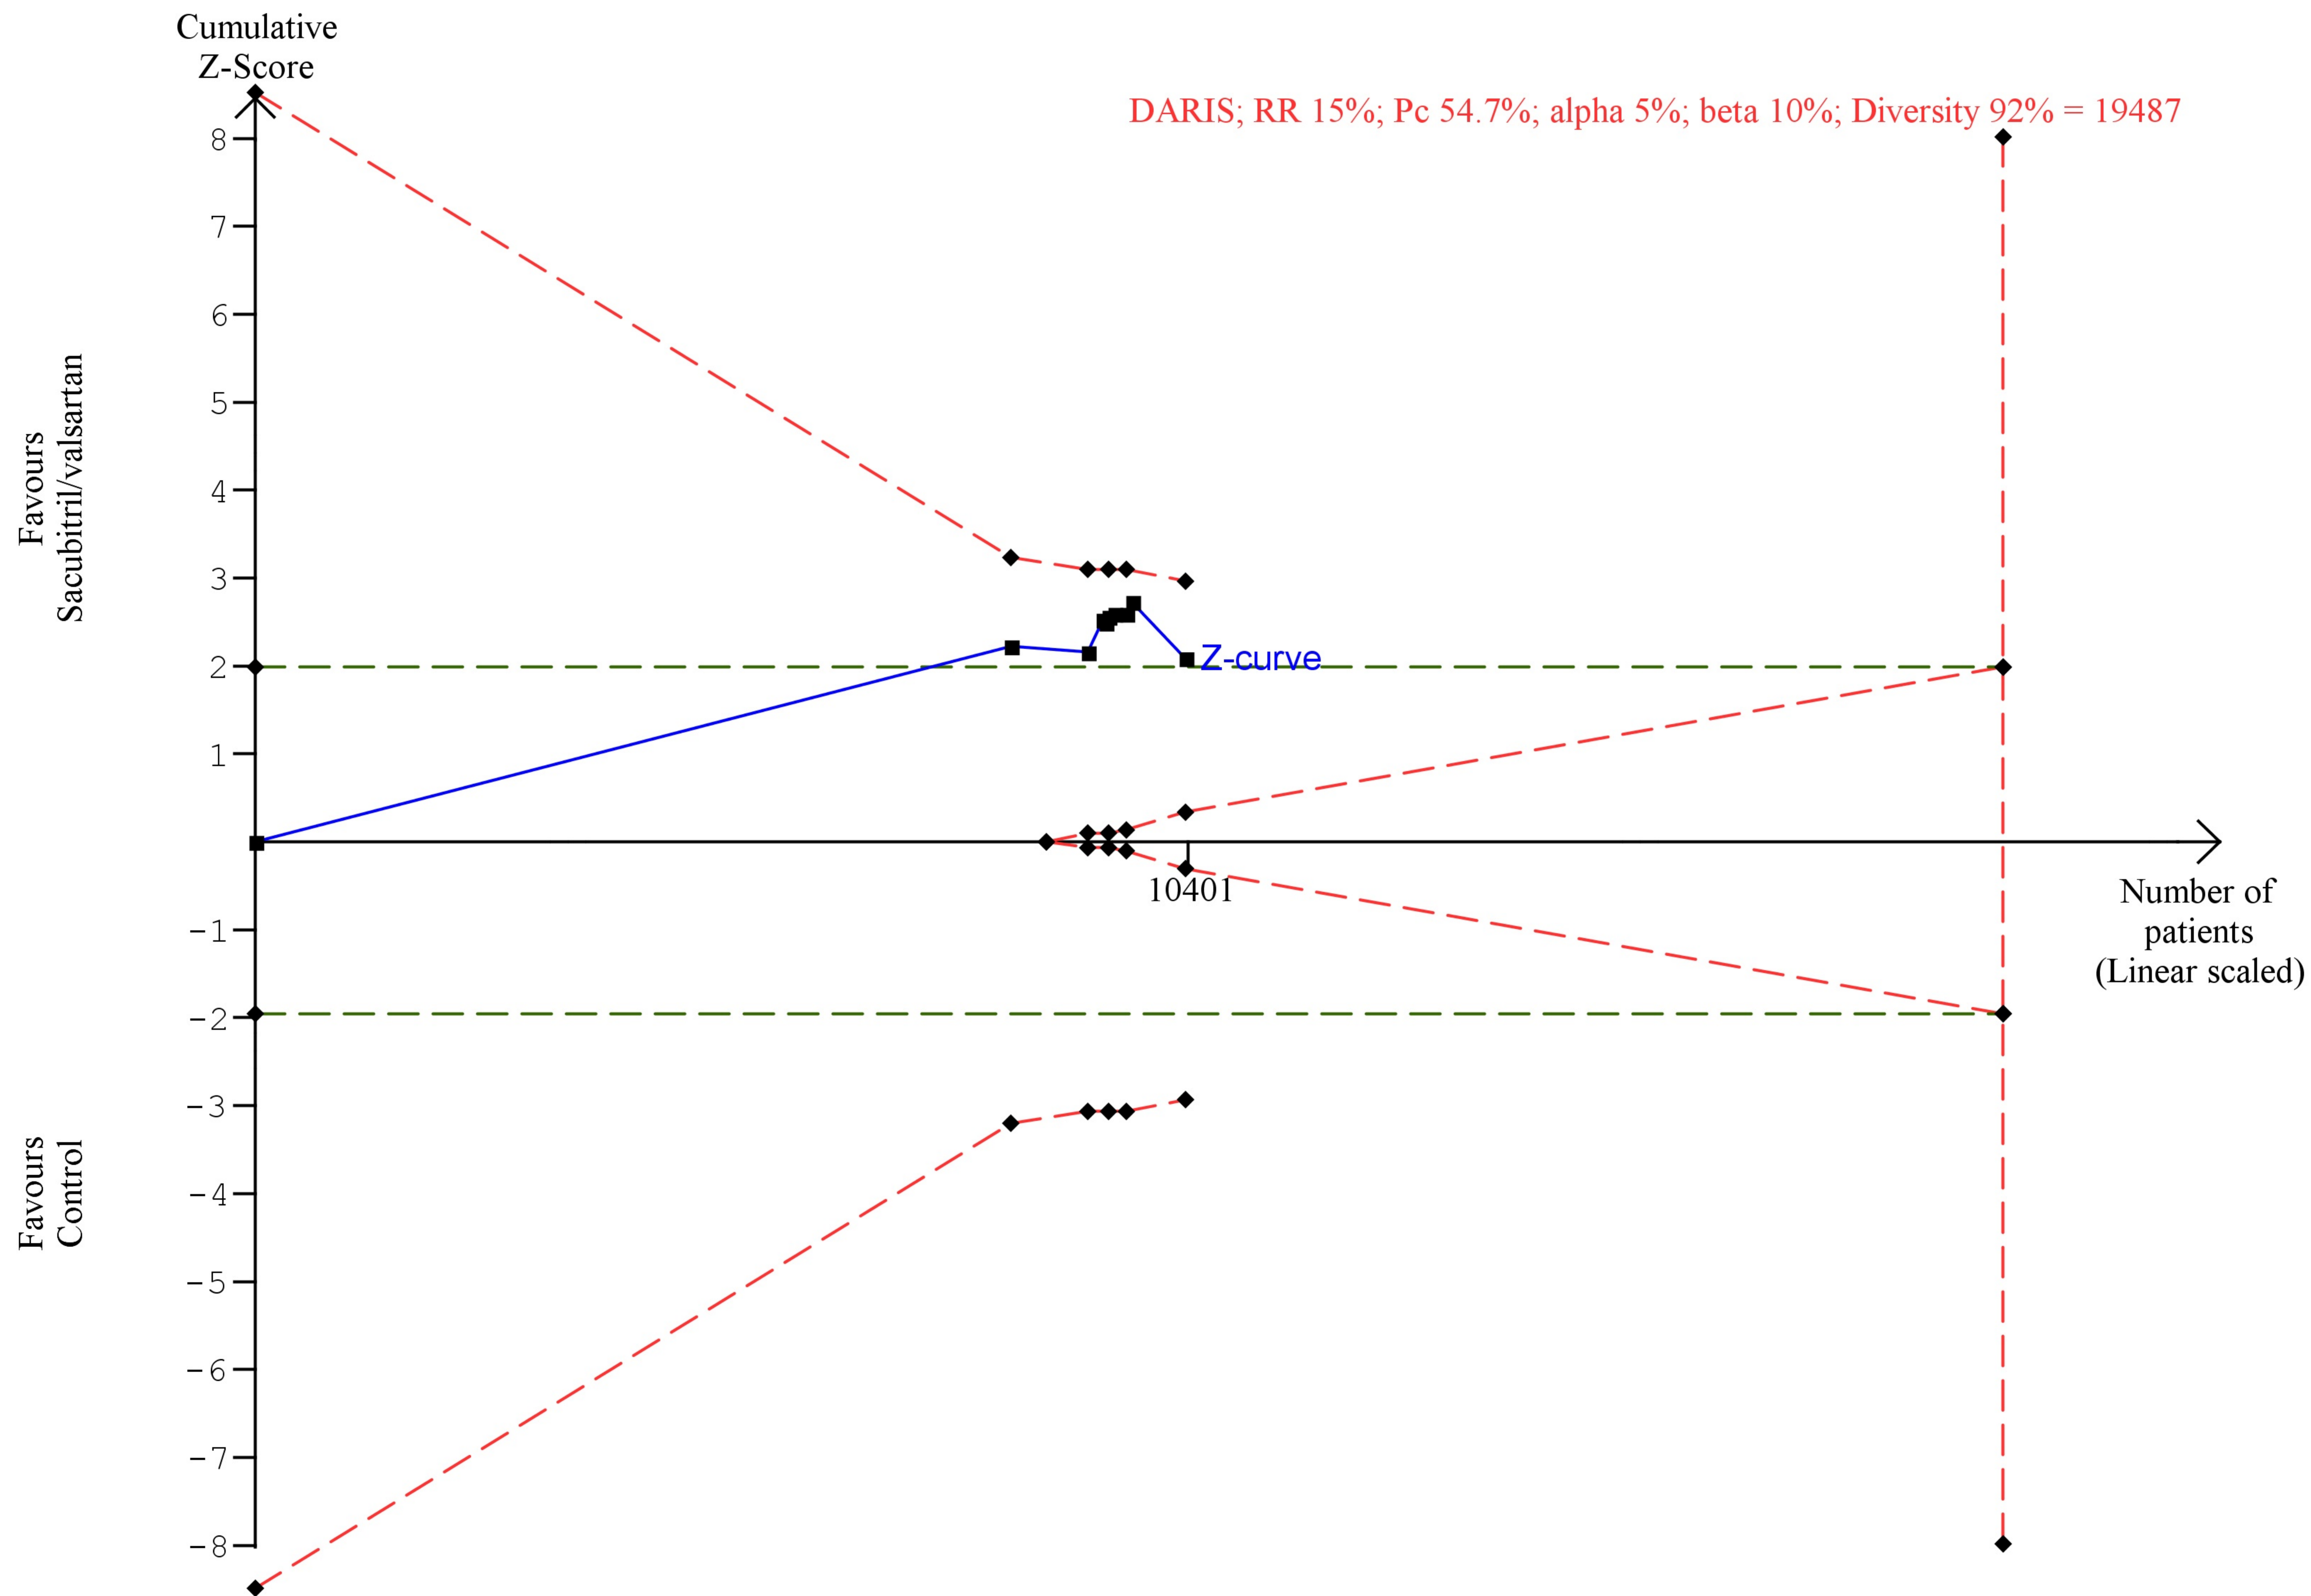

DARIS; RR 15%; Pc 54.7%; alpha 5%; beta 10%; Diversity 92% = 19487

10401

Z-curve

Supplement: inline-supplementary-material-23 [file inline-supplementary-material-23.pdf]

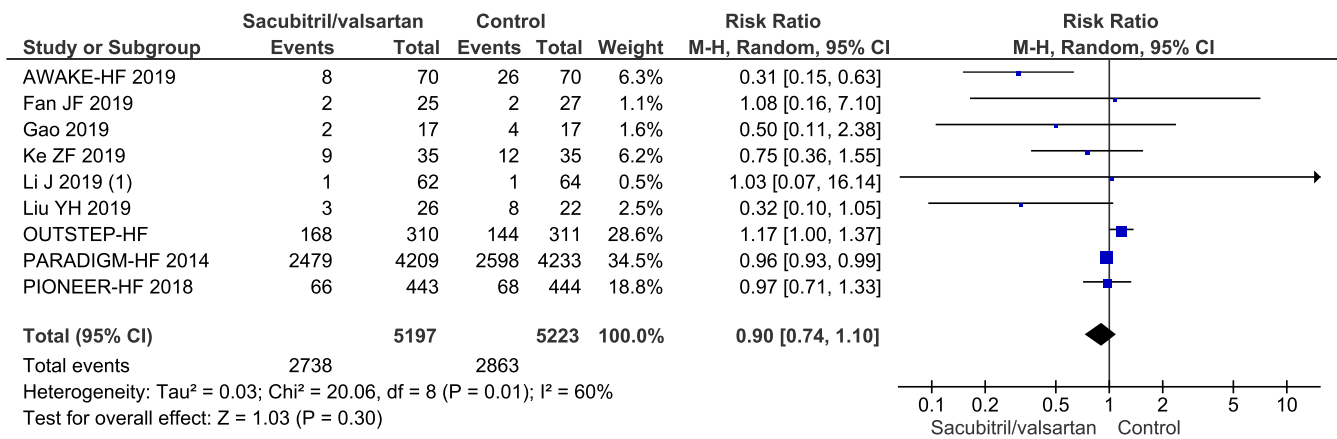

Supplement: inline-supplementary-material-24 [file inline-supplementary-material-24.pdf]

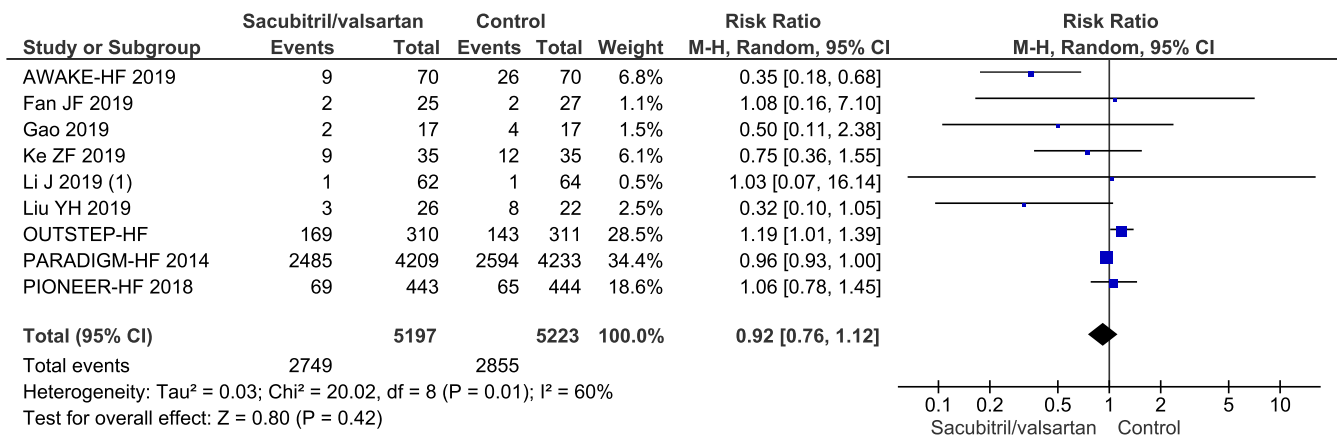

Supplement: inline-supplementary-material-25 [file inline-supplementary-material-25.pdf]

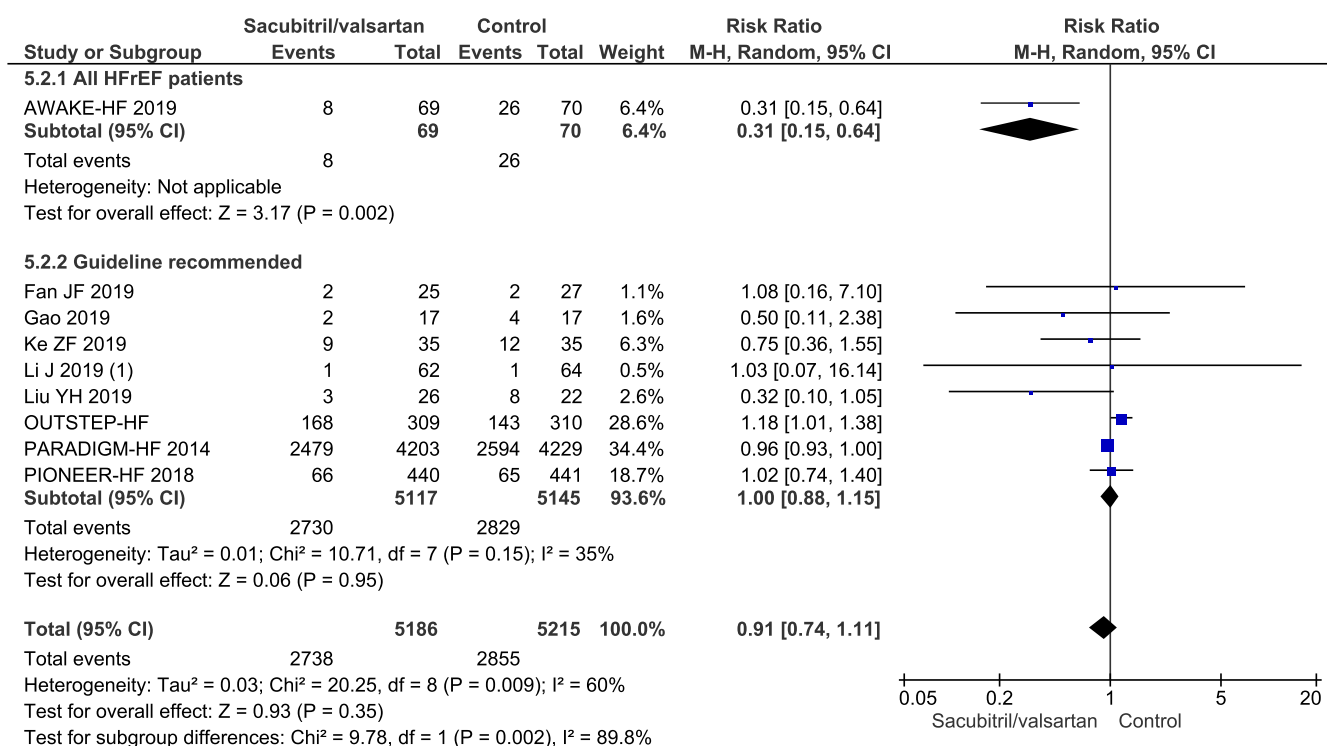

Supplement: inline-supplementary-material-26 [file inline-supplementary-material-26.pdf]

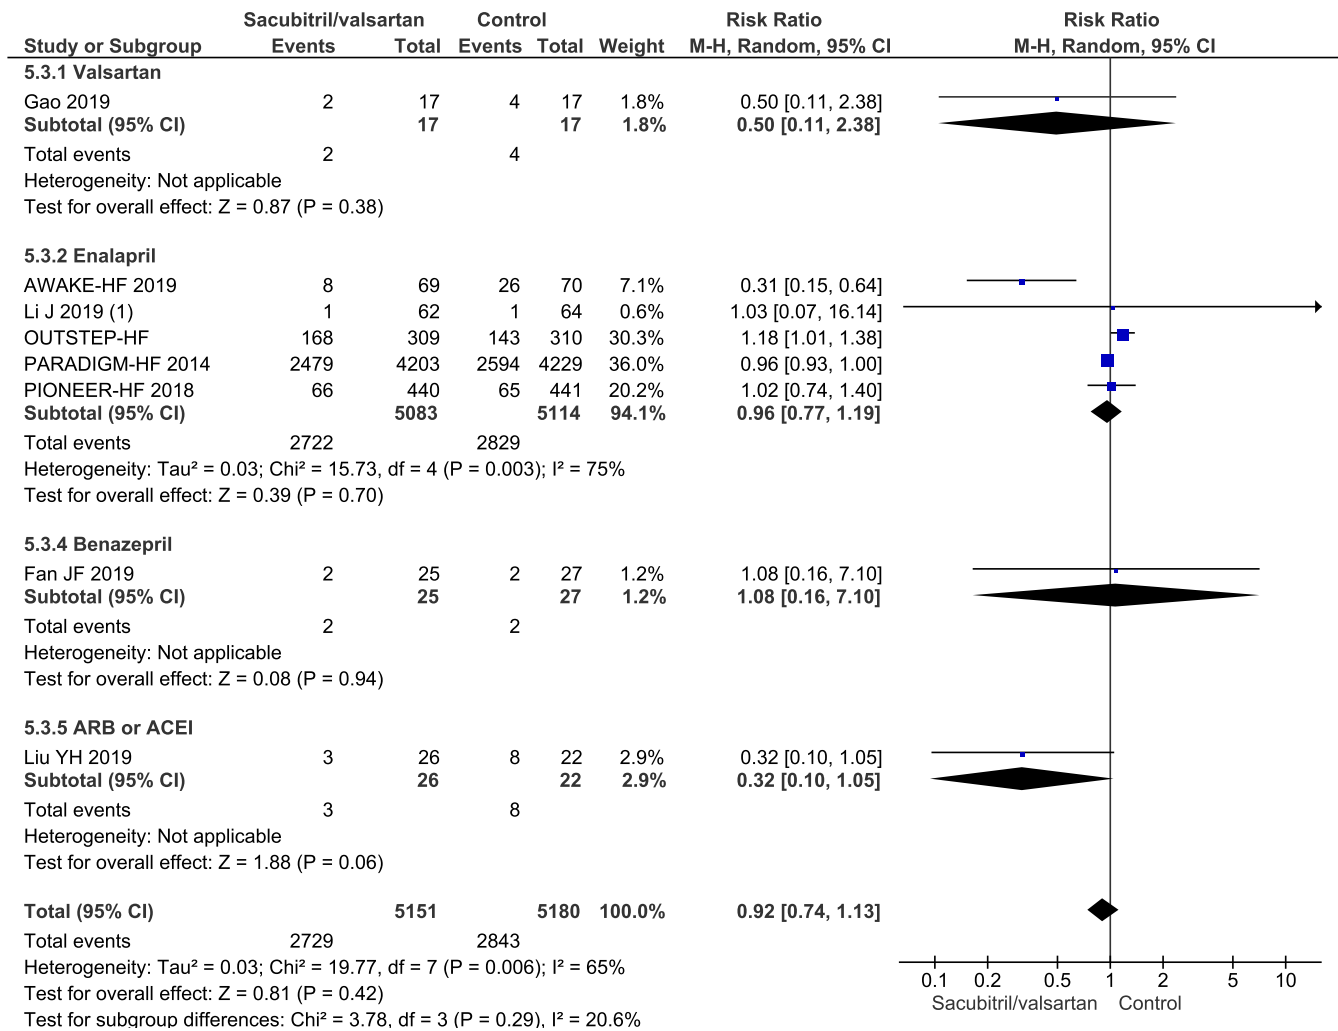

Supplement: inline-supplementary-material-27 [file inline-supplementary-material-27.pdf]

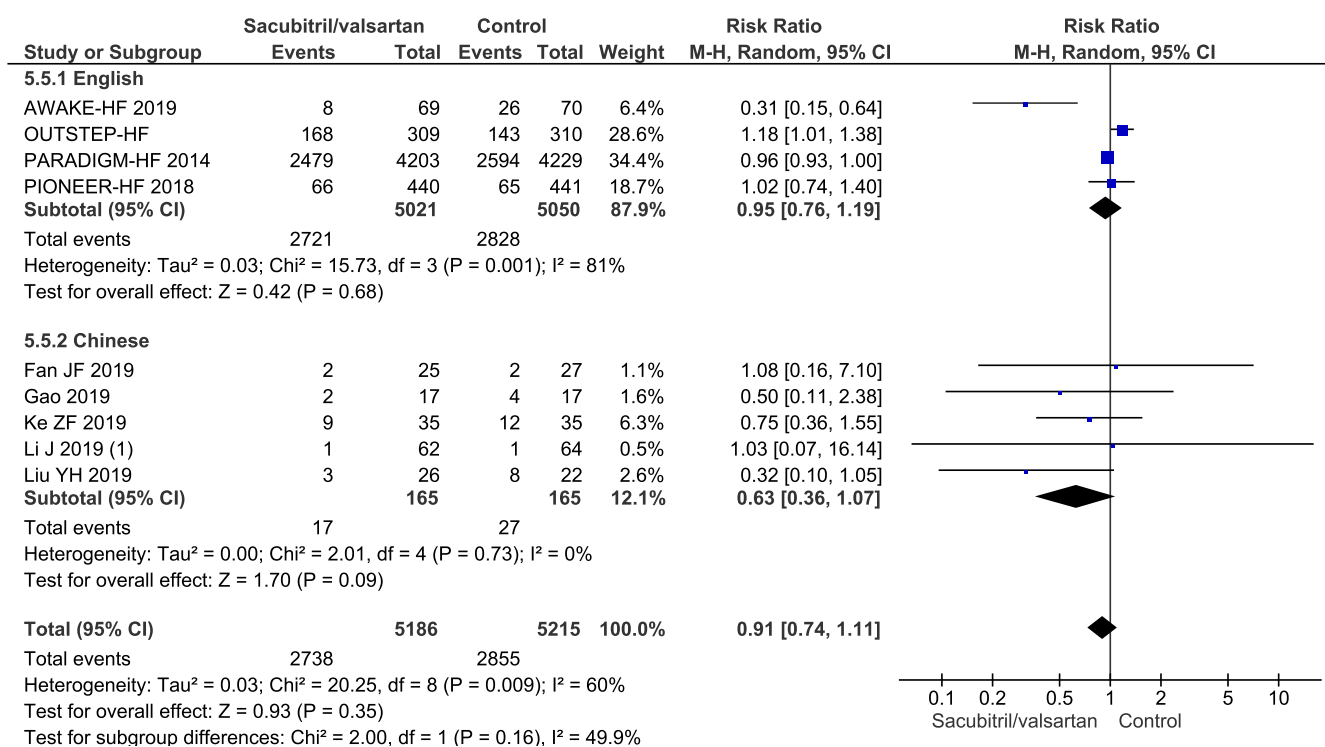

Supplement: inline-supplementary-material-28 [file inline-supplementary-material-28.pdf]

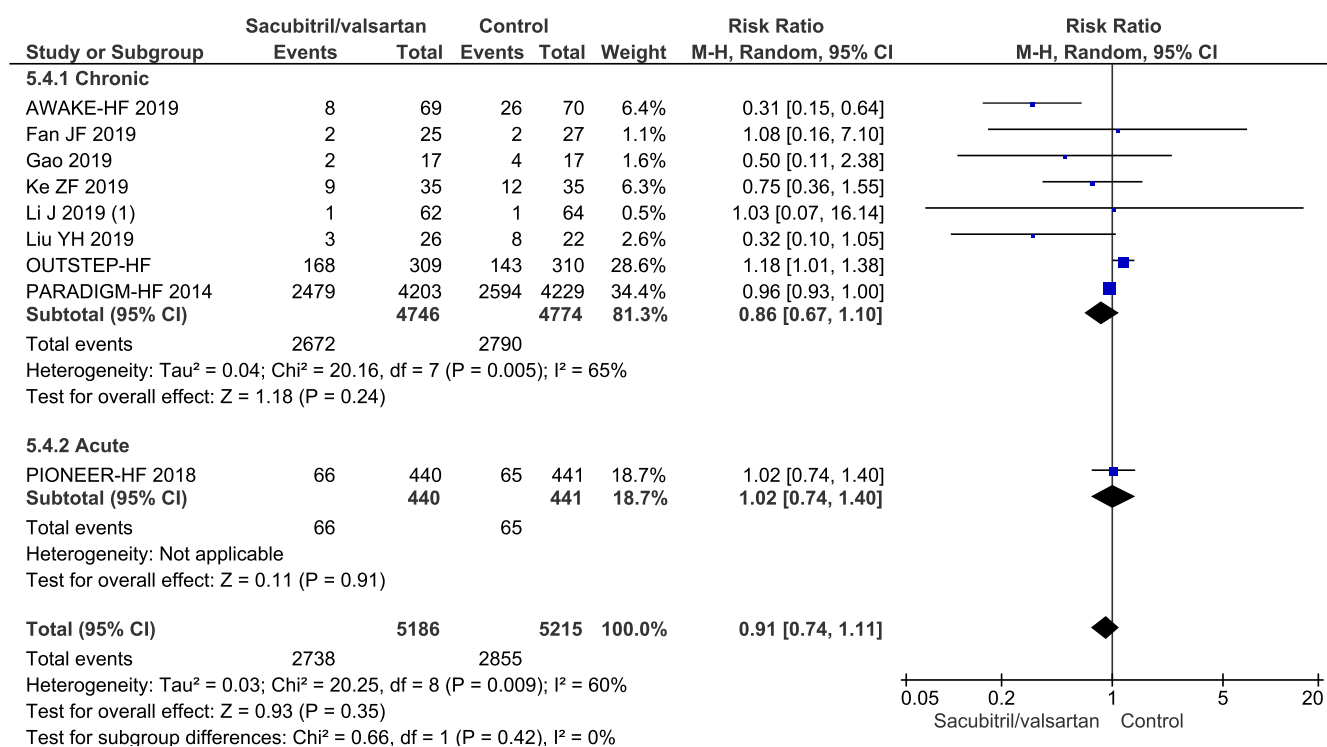

Supplement: inline-supplementary-material-29 [file inline-supplementary-material-29.pdf]

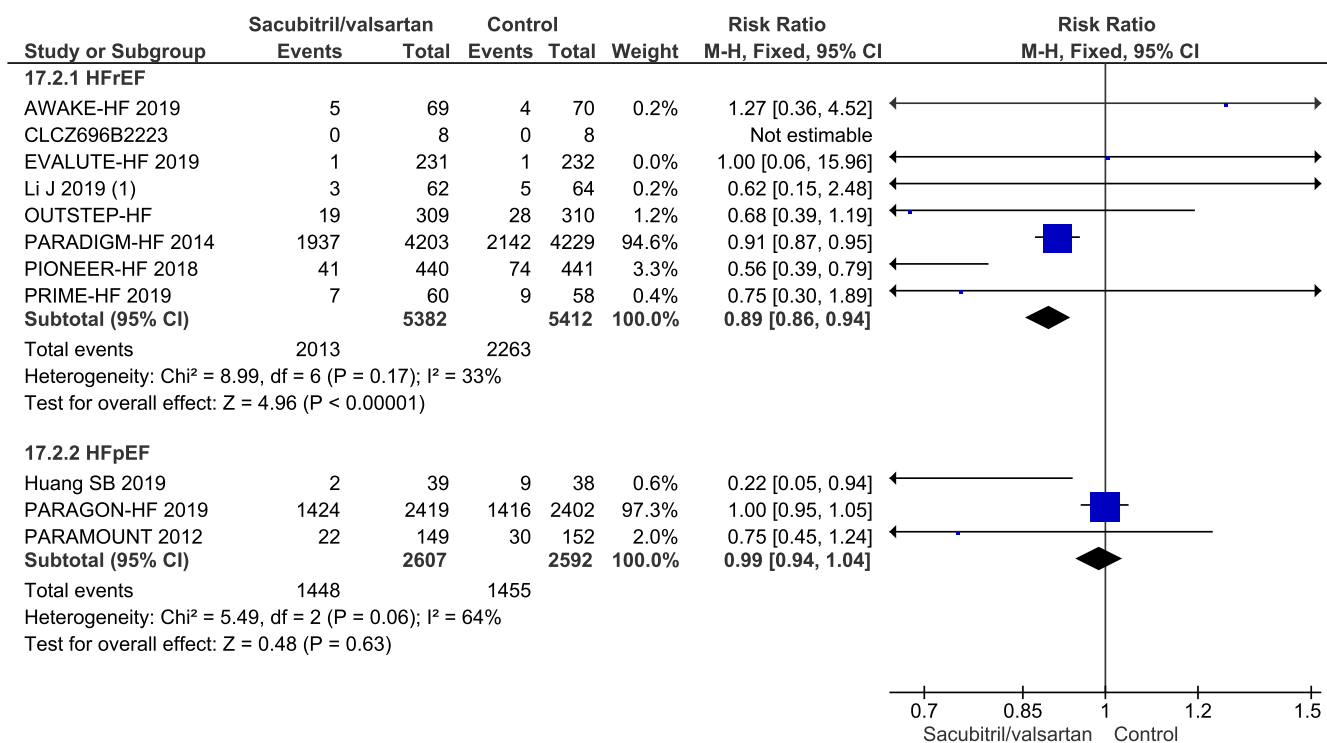

Supplement: inline-supplementary-material-3 [file inline-supplementary-material-3.pdf]

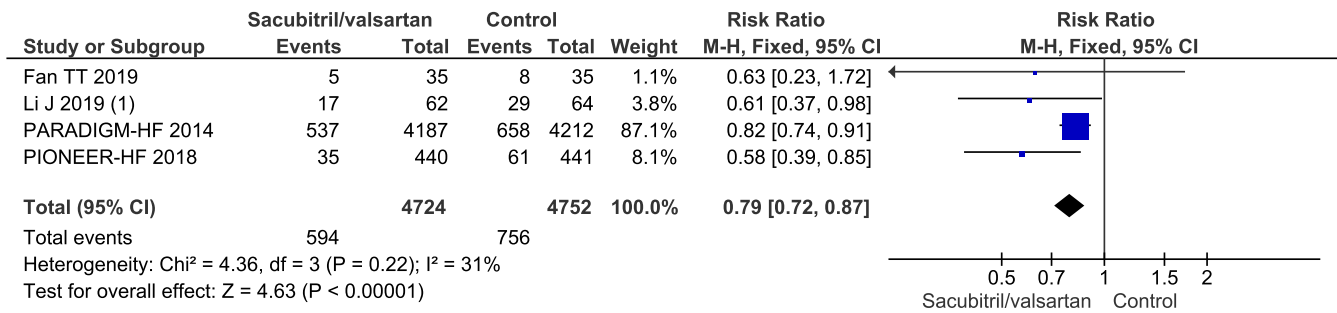

Supplement: inline-supplementary-material-30 [file inline-supplementary-material-30.pdf]

DARIS; RR 15%; Pc 15.9%; alpha 5%; beta 10%; Diversity 72% is a Two-sided graph

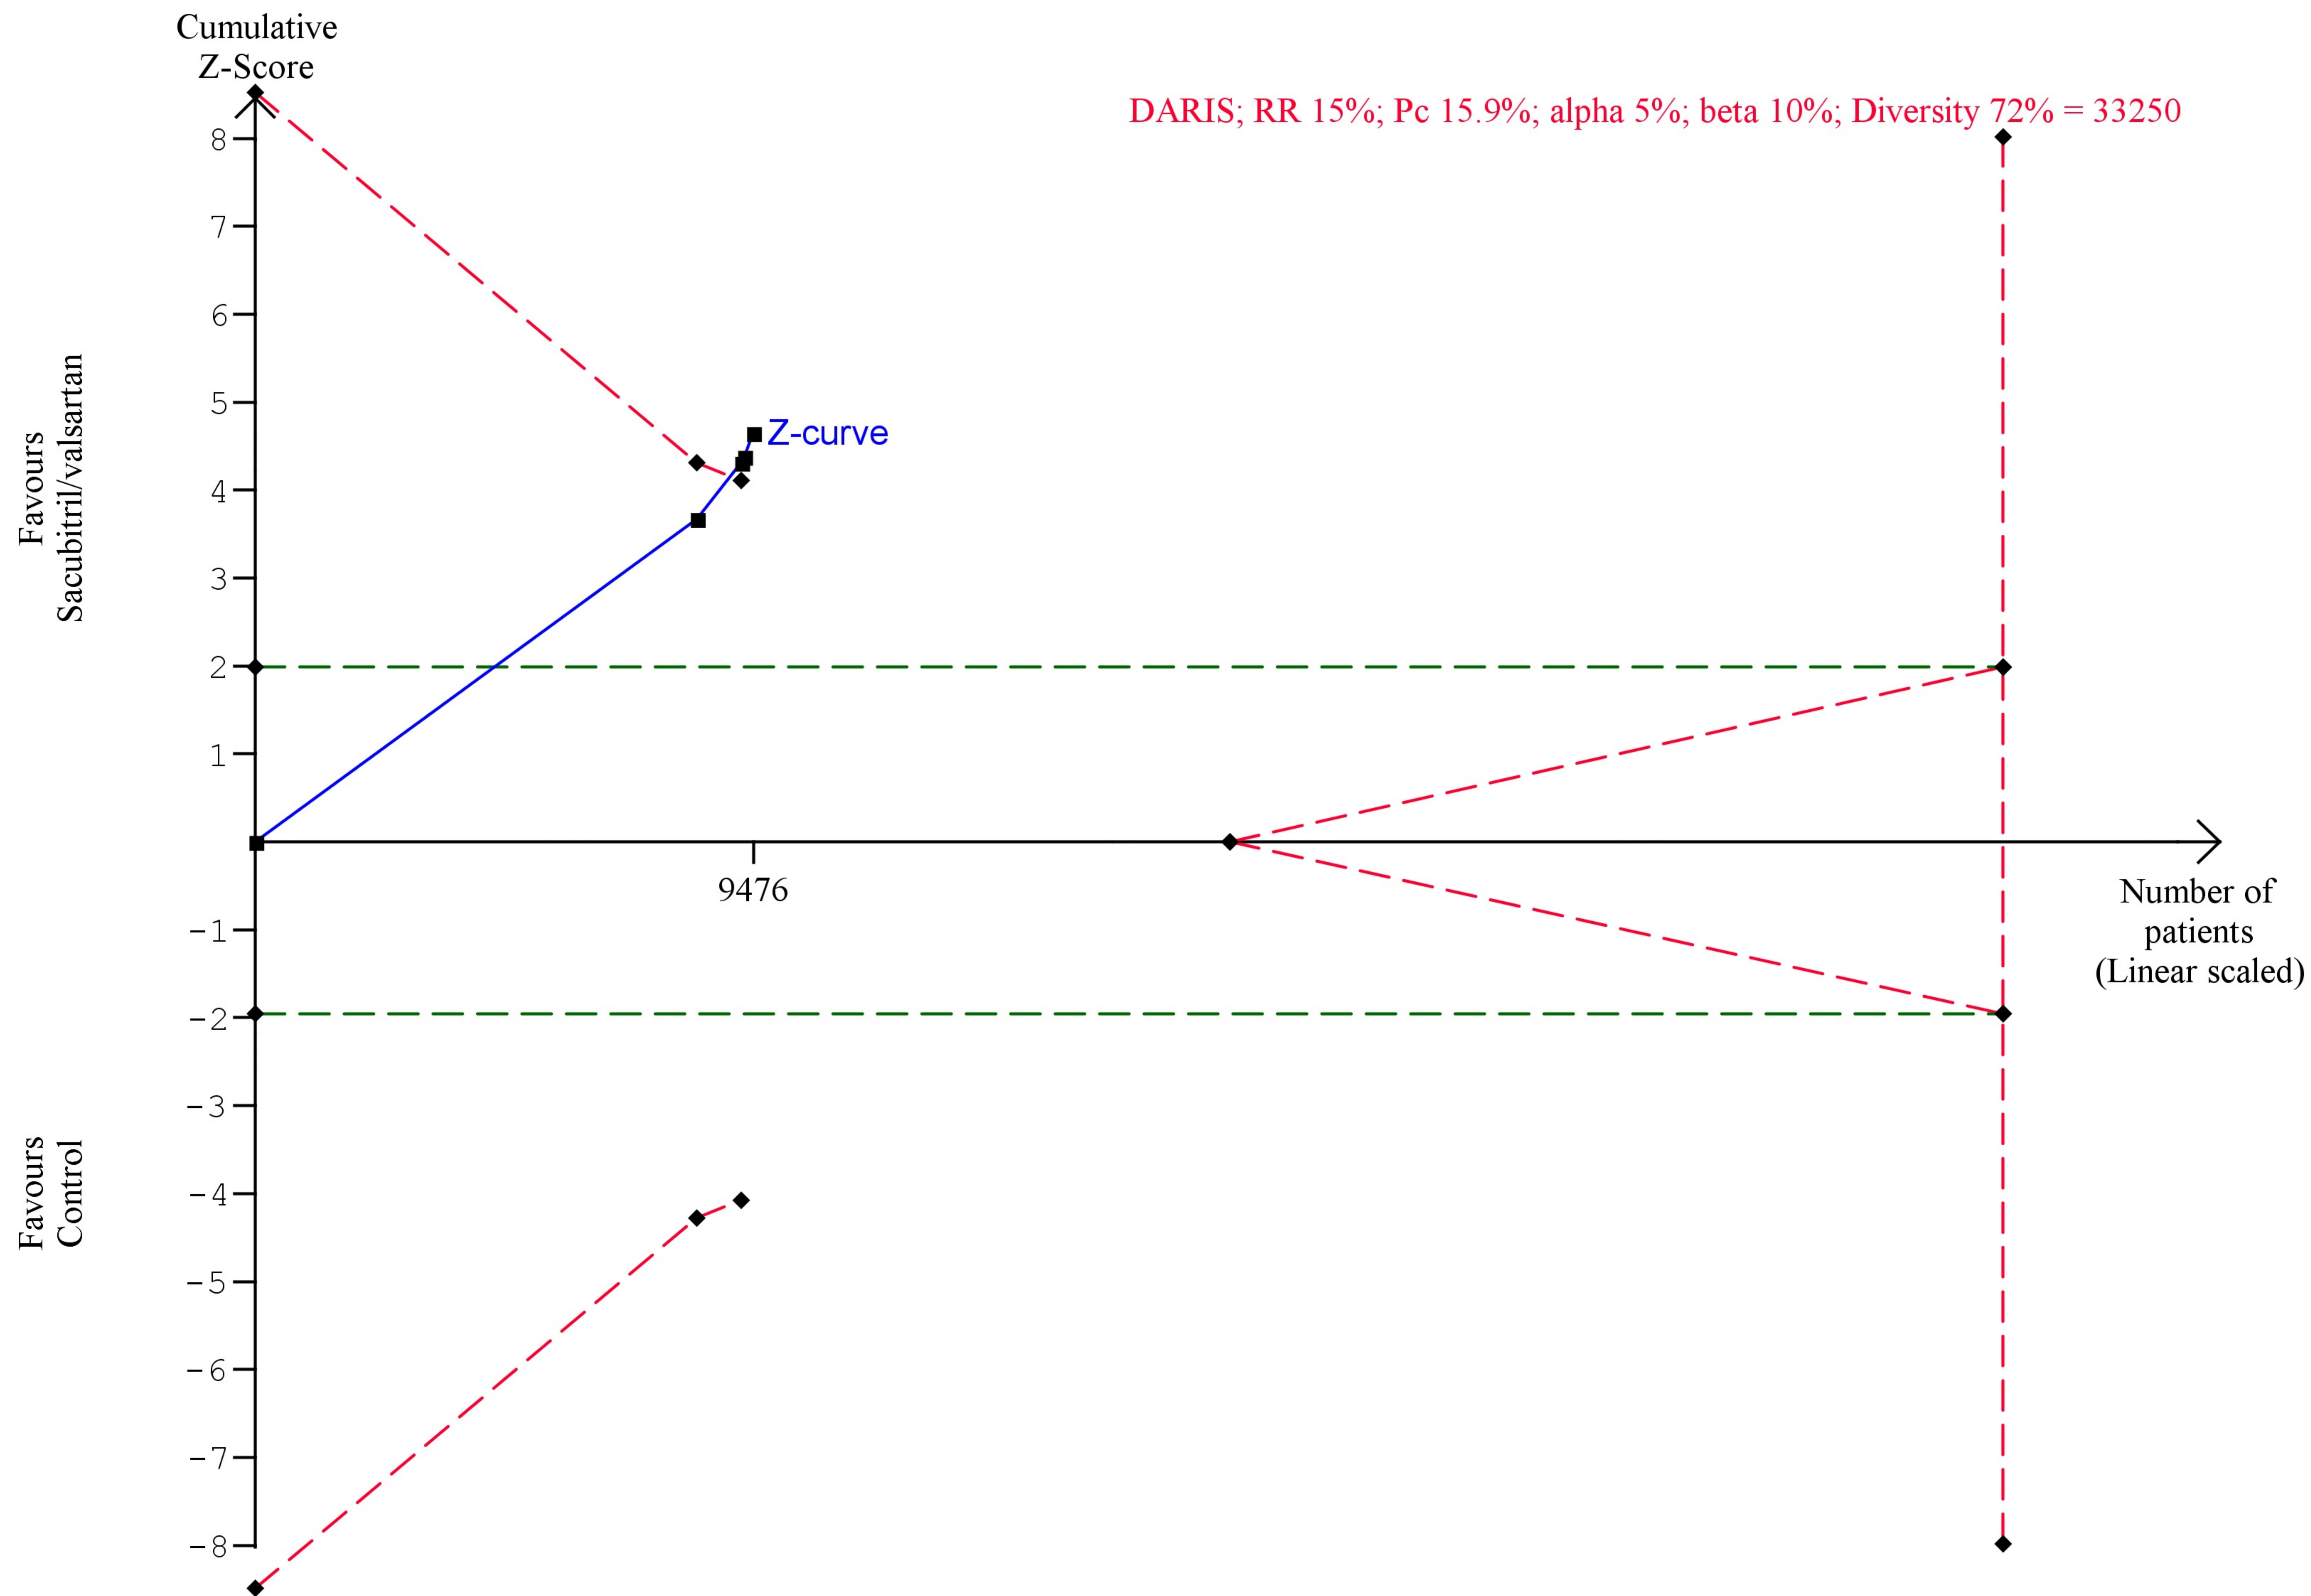

Supplement: inline-supplementary-material-31 [file inline-supplementary-material-31.pdf]

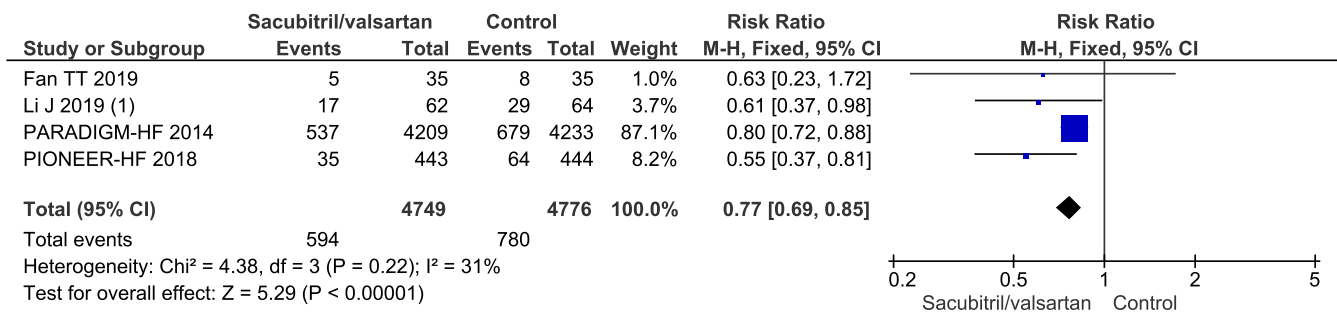

Supplement: inline-supplementary-material-32 [file inline-supplementary-material-32.pdf]

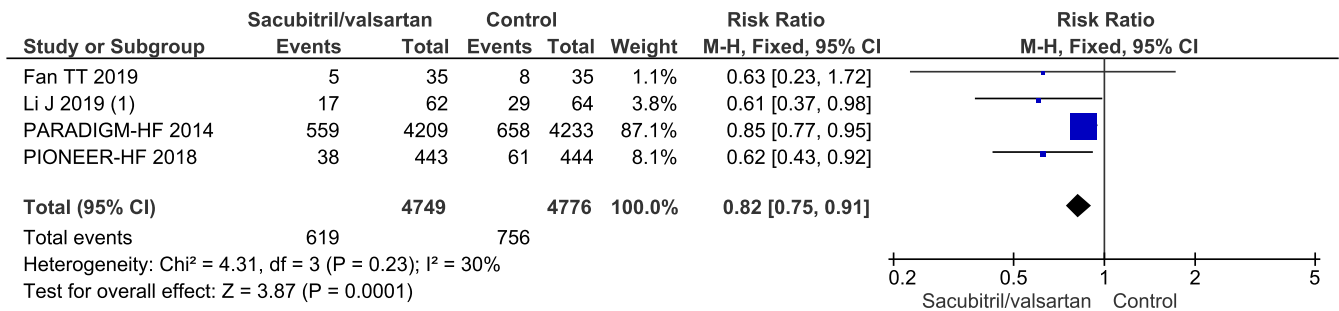

Supplement: inline-supplementary-material-33 [file inline-supplementary-material-33.pdf]

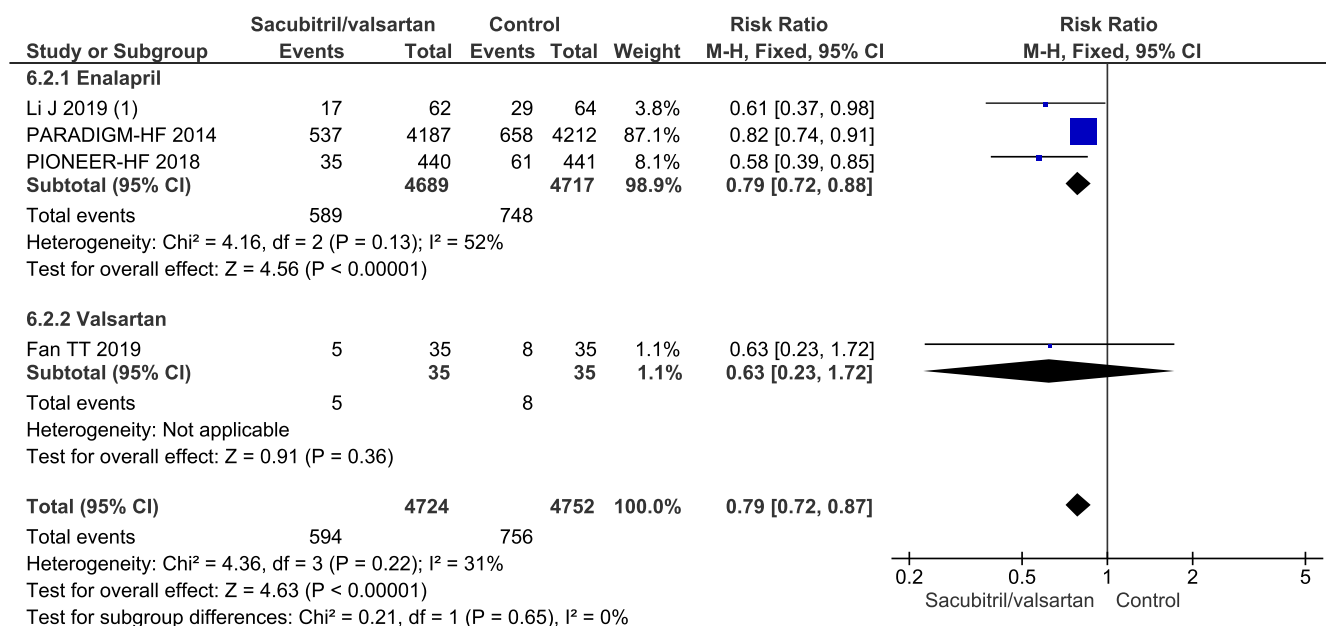

Supplement: inline-supplementary-material-34 [file inline-supplementary-material-34.pdf]

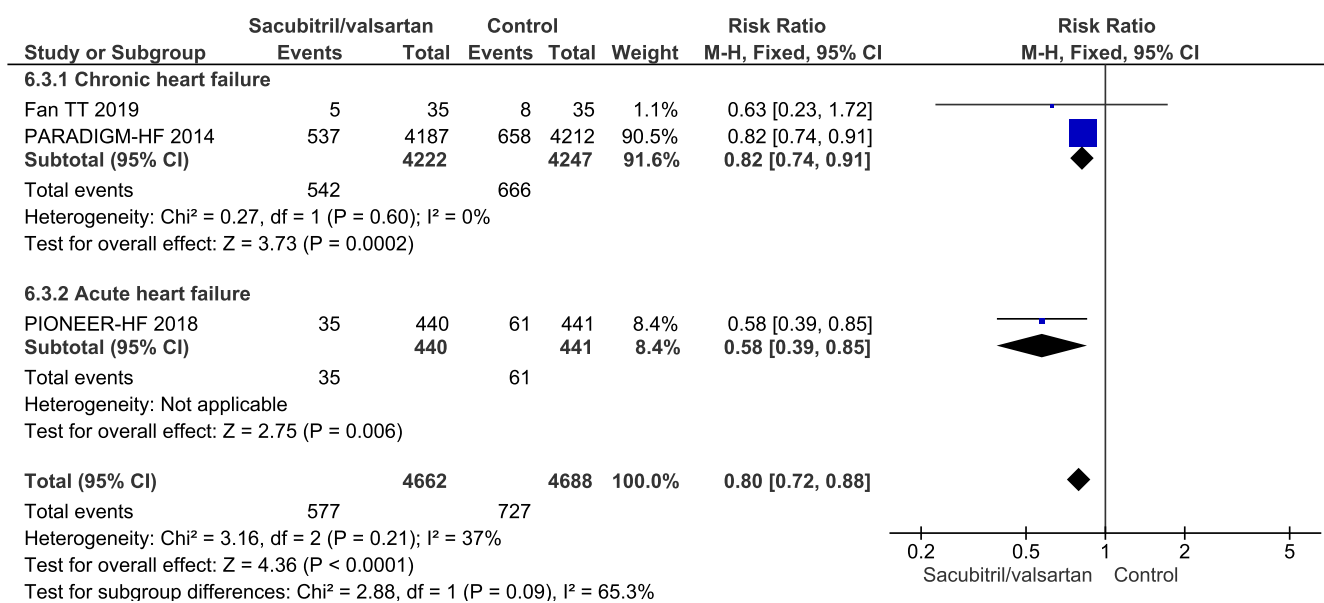

Supplement: inline-supplementary-material-35 [file inline-supplementary-material-35.pdf]

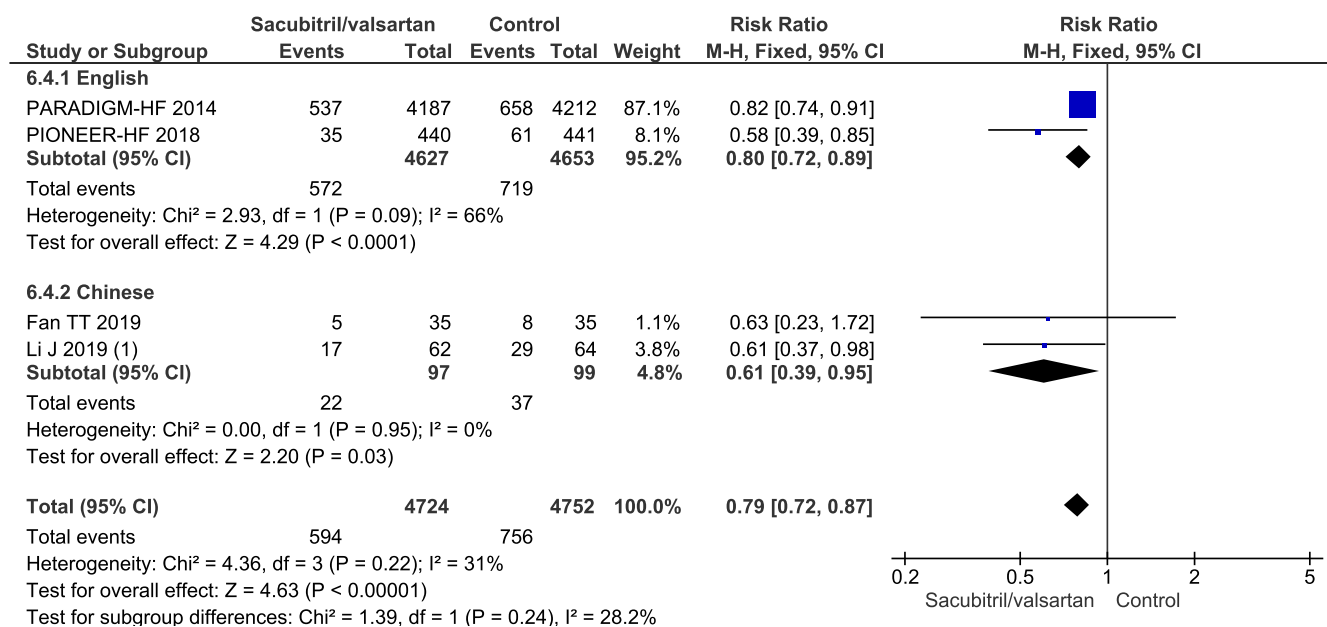

Supplement: inline-supplementary-material-36 [file inline-supplementary-material-36.pdf]

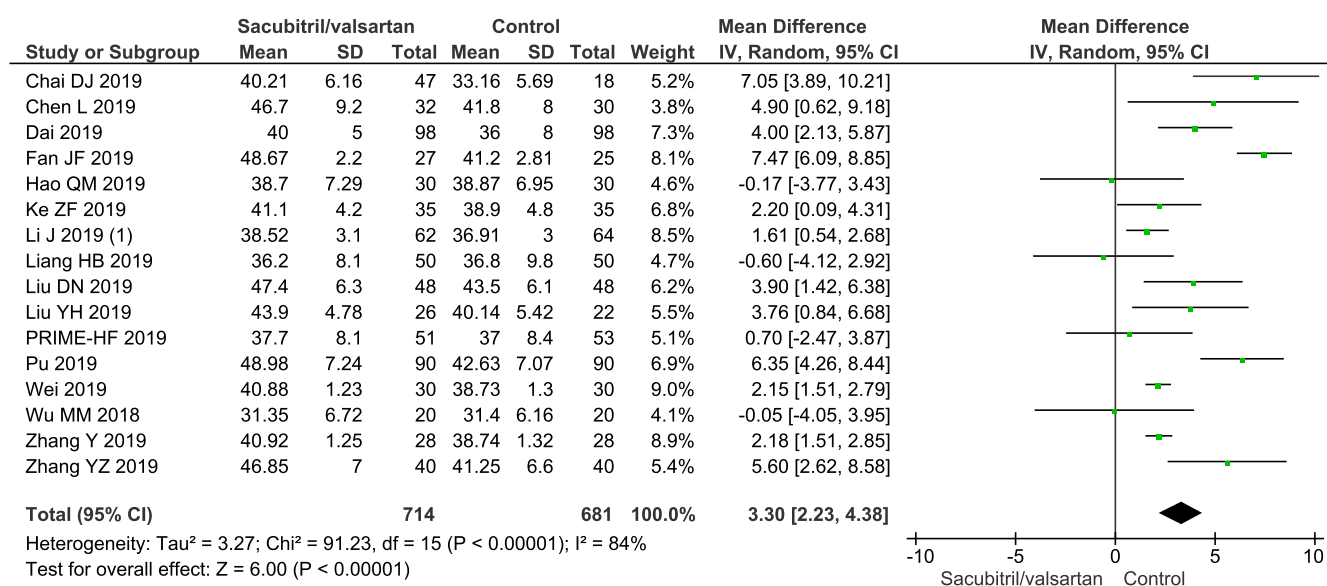

Supplement: inline-supplementary-material-37 [file inline-supplementary-material-37.pdf]

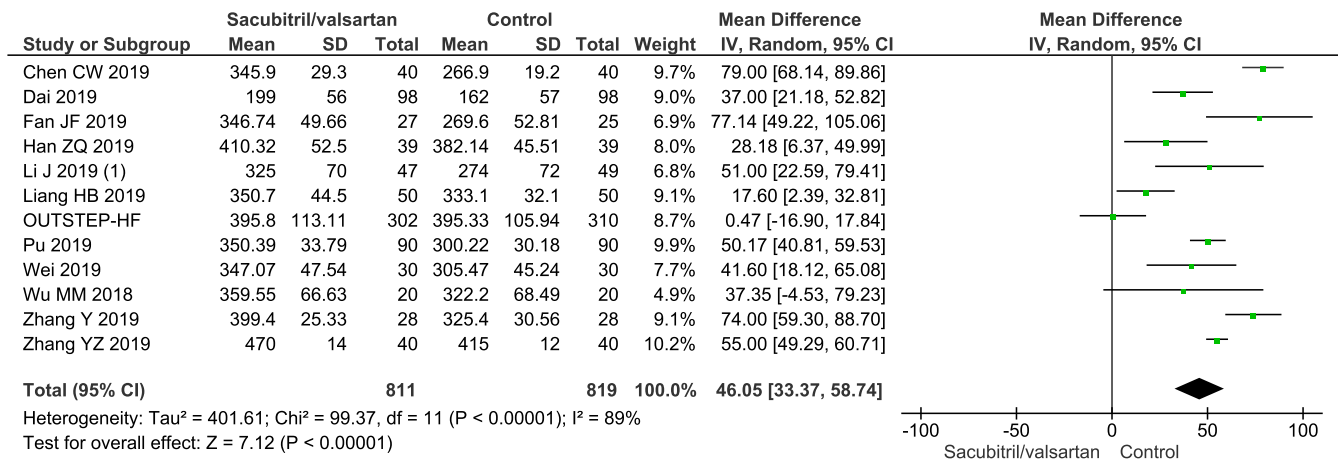

Supplement: inline-supplementary-material-38 [file inline-supplementary-material-38.pdf]

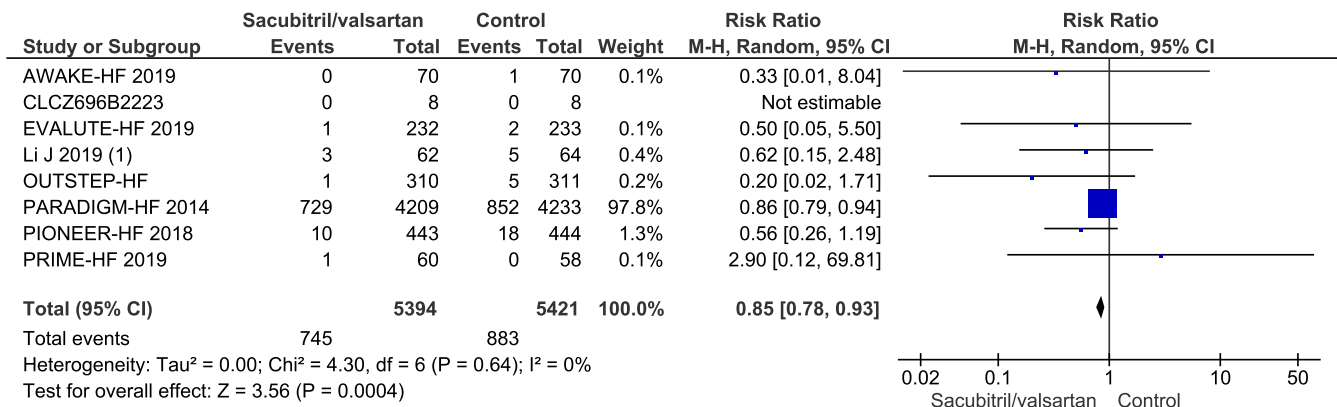

Supplement: inline-supplementary-material-4 [file inline-supplementary-material-4.pdf]

### DARIS; RR 15%; Pc 14%; alfa 3.3%; beta 10%; Diversity 0% is a Two-sided graph

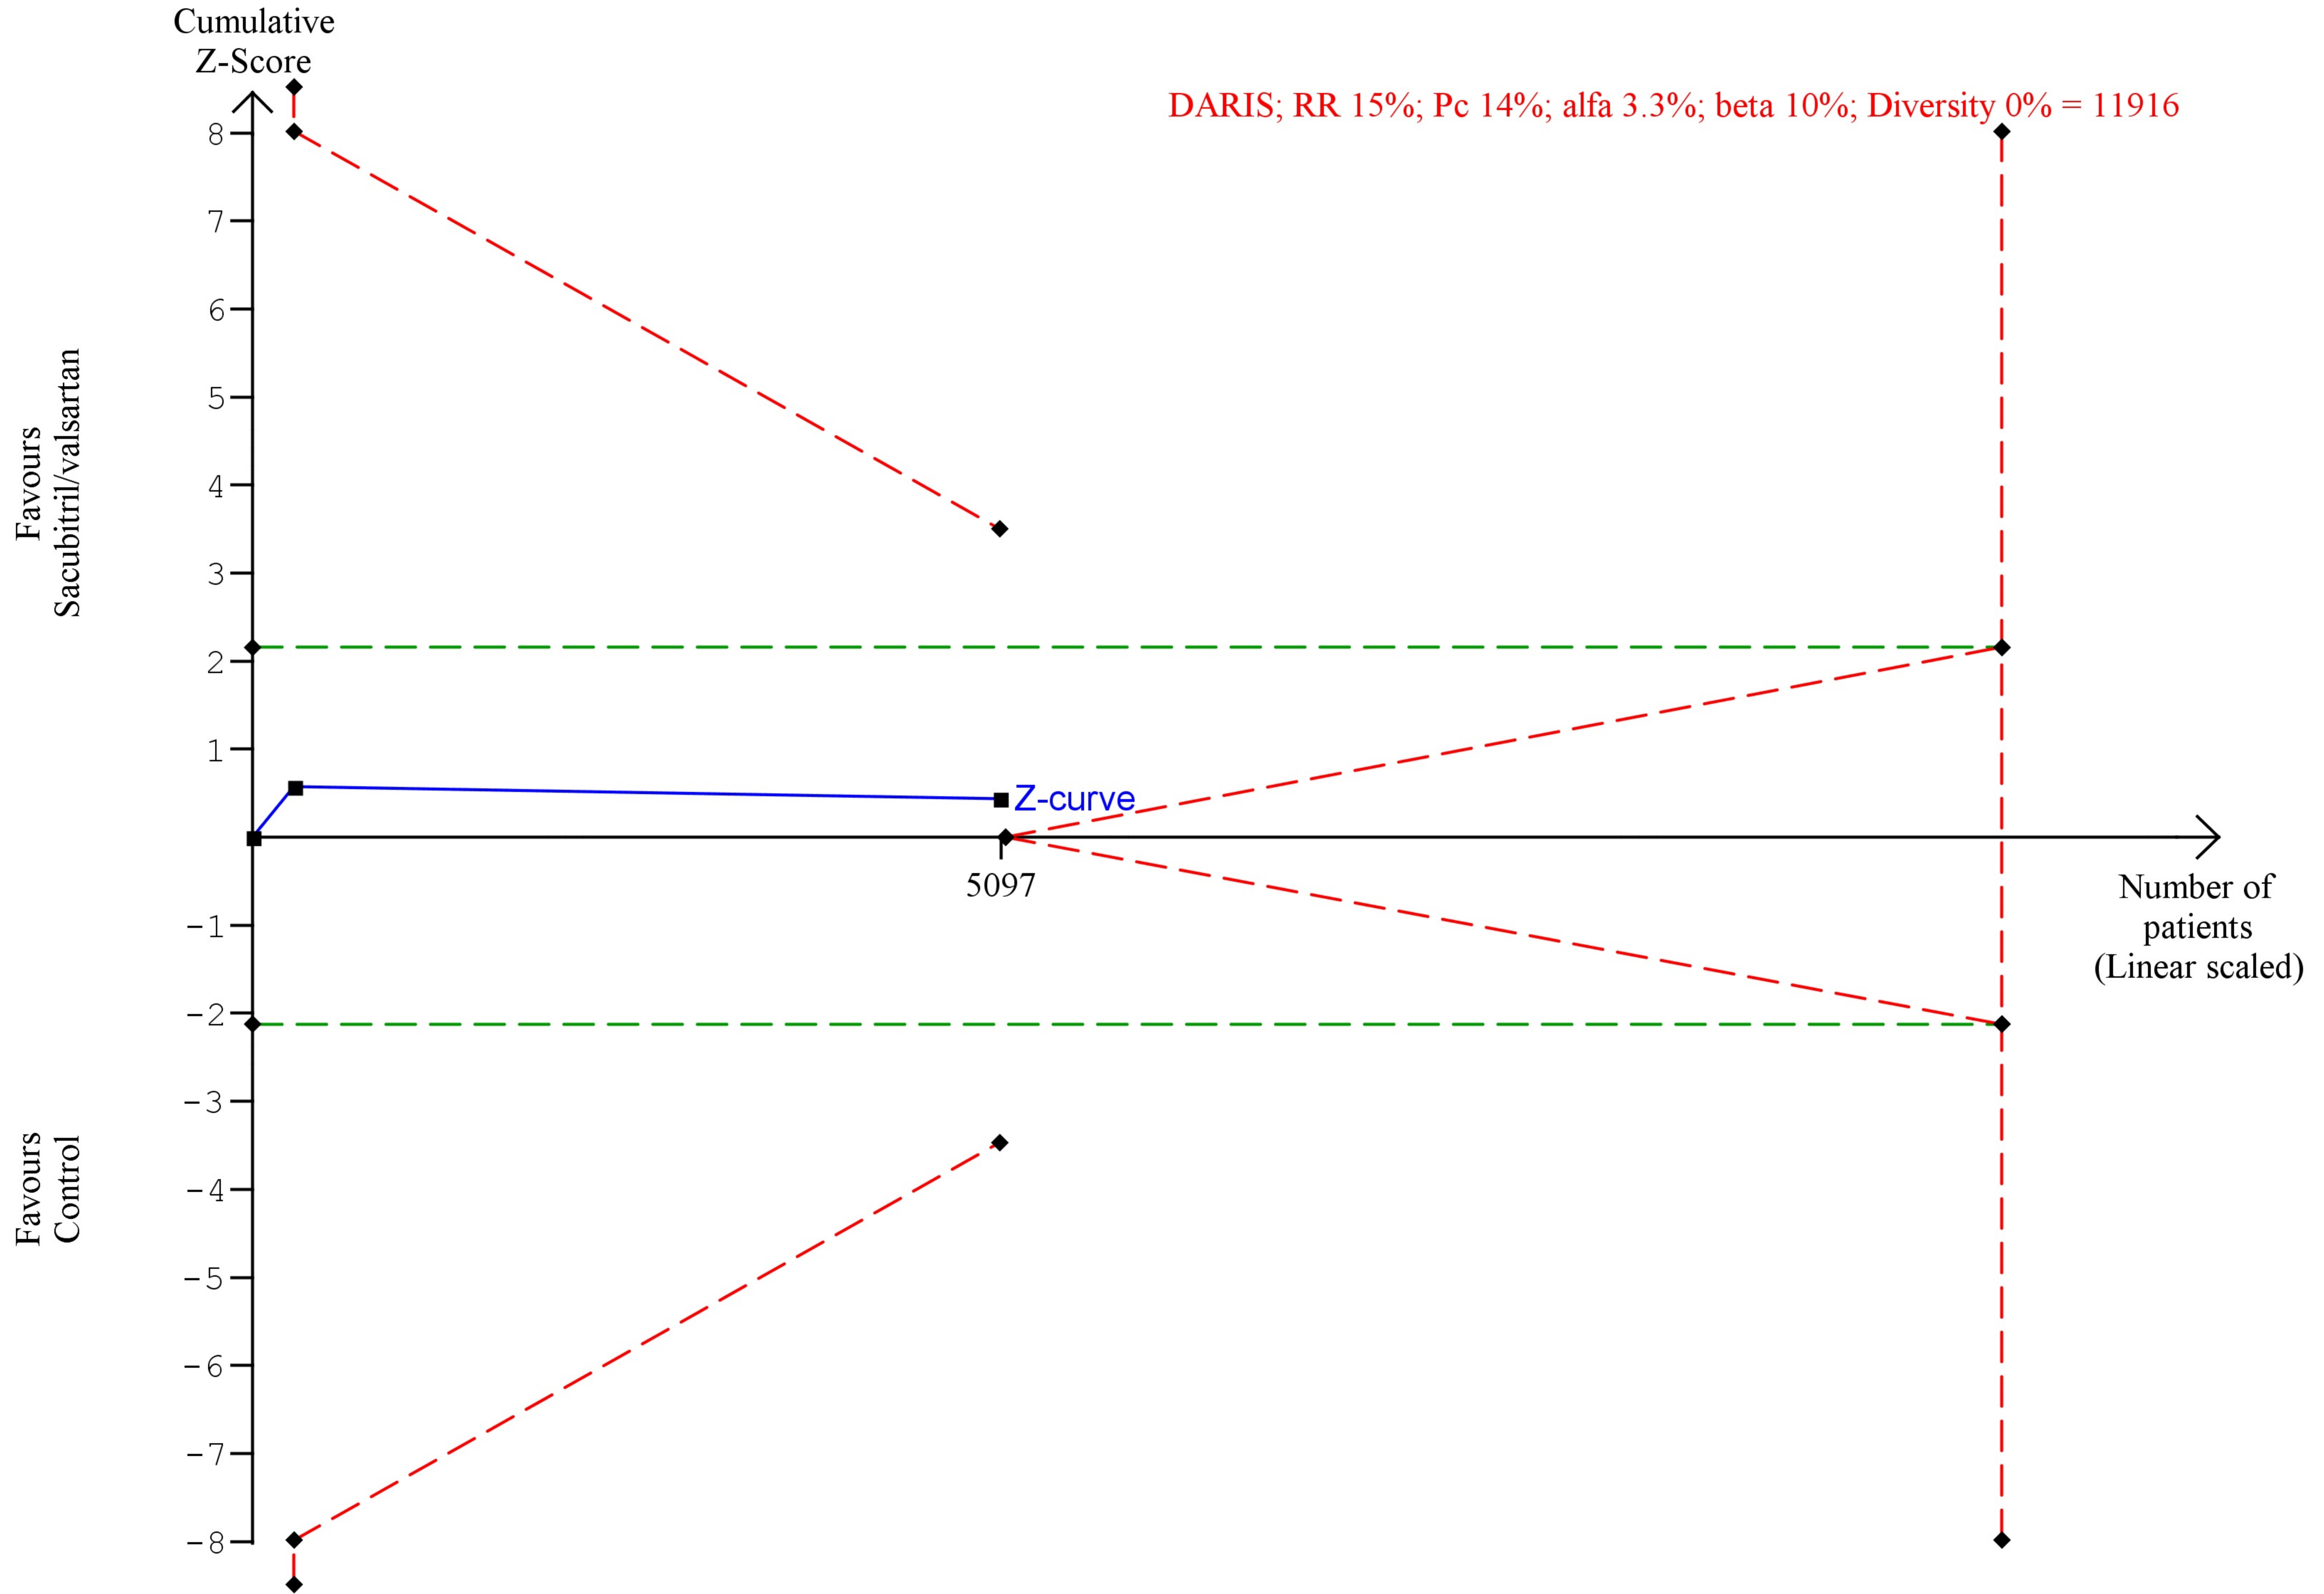

Supplement: inline-supplementary-material-40 [file inline-supplementary-material-40.pdf]

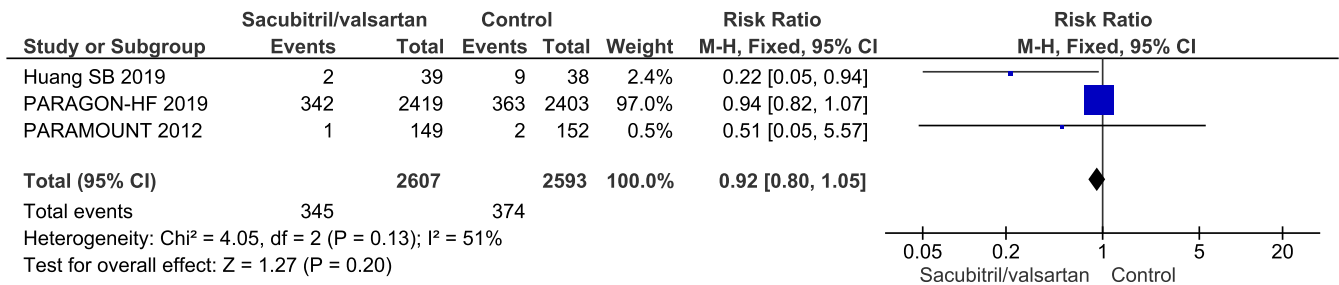

Supplement: inline-supplementary-material-41 [file inline-supplementary-material-41.pdf]

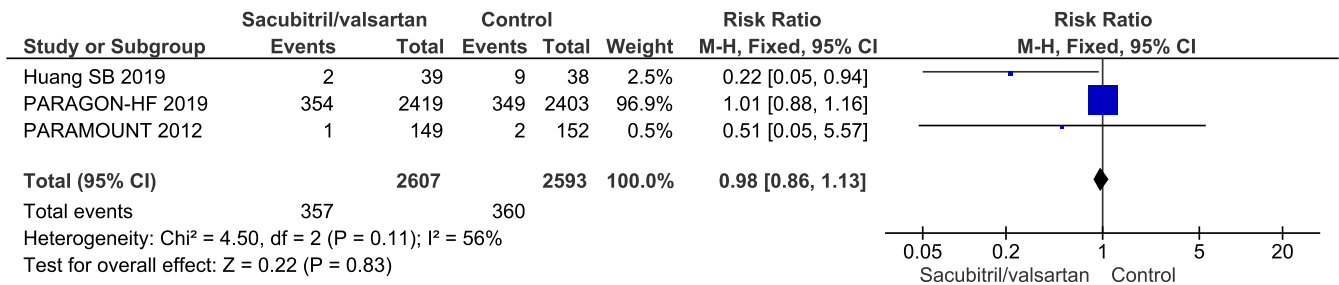

Supplement: inline-supplementary-material-42 [file inline-supplementary-material-42.pdf]

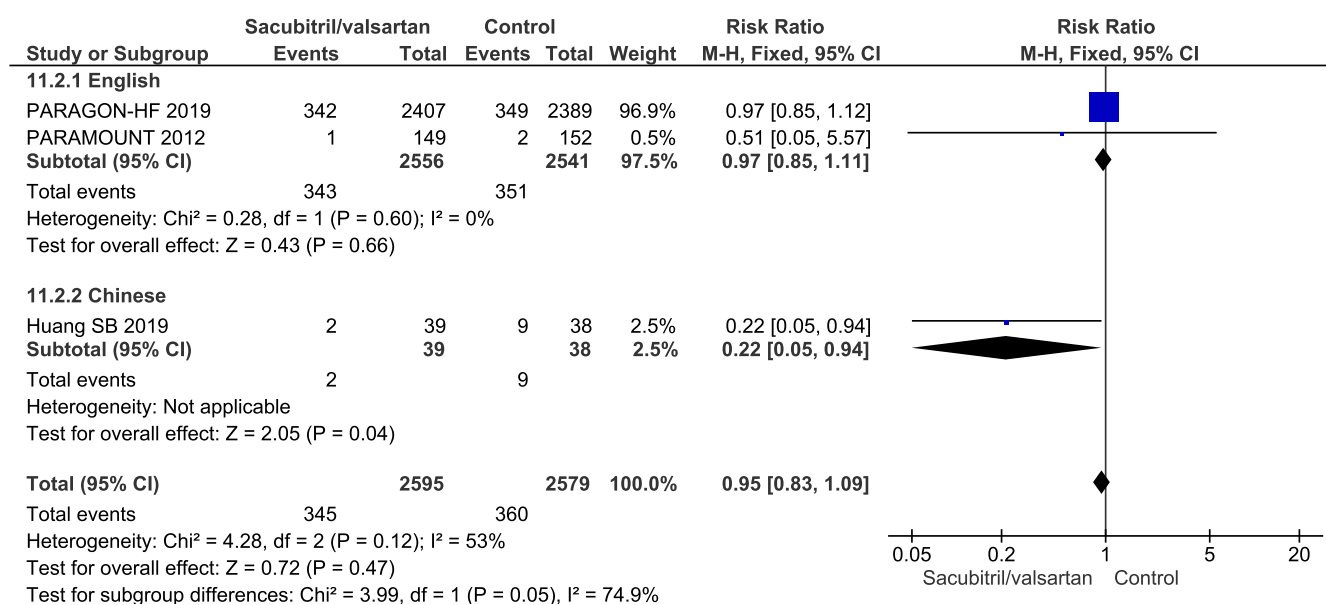

Supplement: inline-supplementary-material-43 [file inline-supplementary-material-43.pdf]

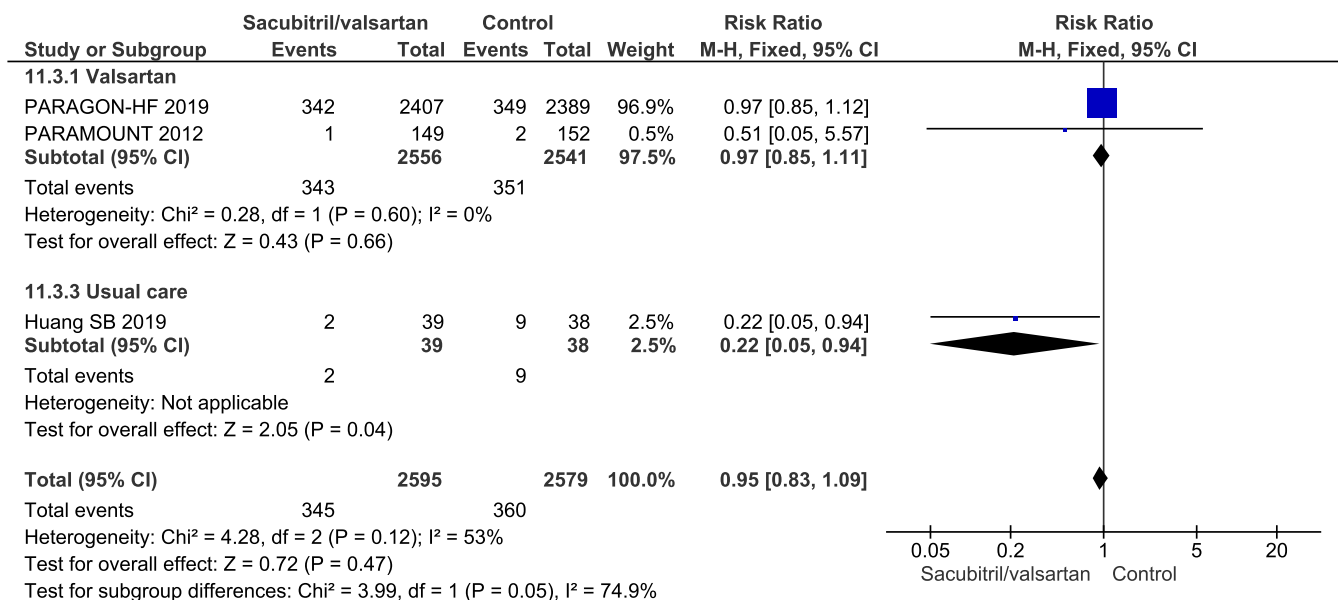

Supplement: inline-supplementary-material-44 [file inline-supplementary-material-44.pdf]

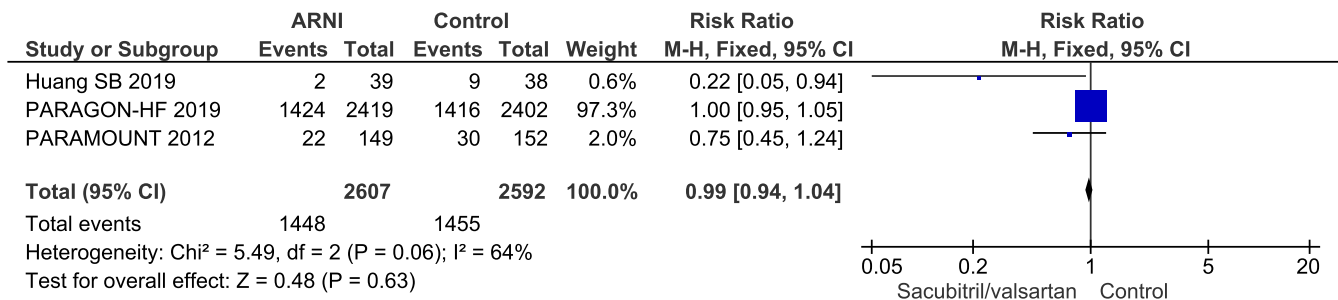

Supplement: inline-supplementary-material-45 [file inline-supplementary-material-45.pdf]

DARIS; RR 15%; Pc 56.1%; alpha 3.3%; beta 10%; Diversity 82% is a Two-sided graph

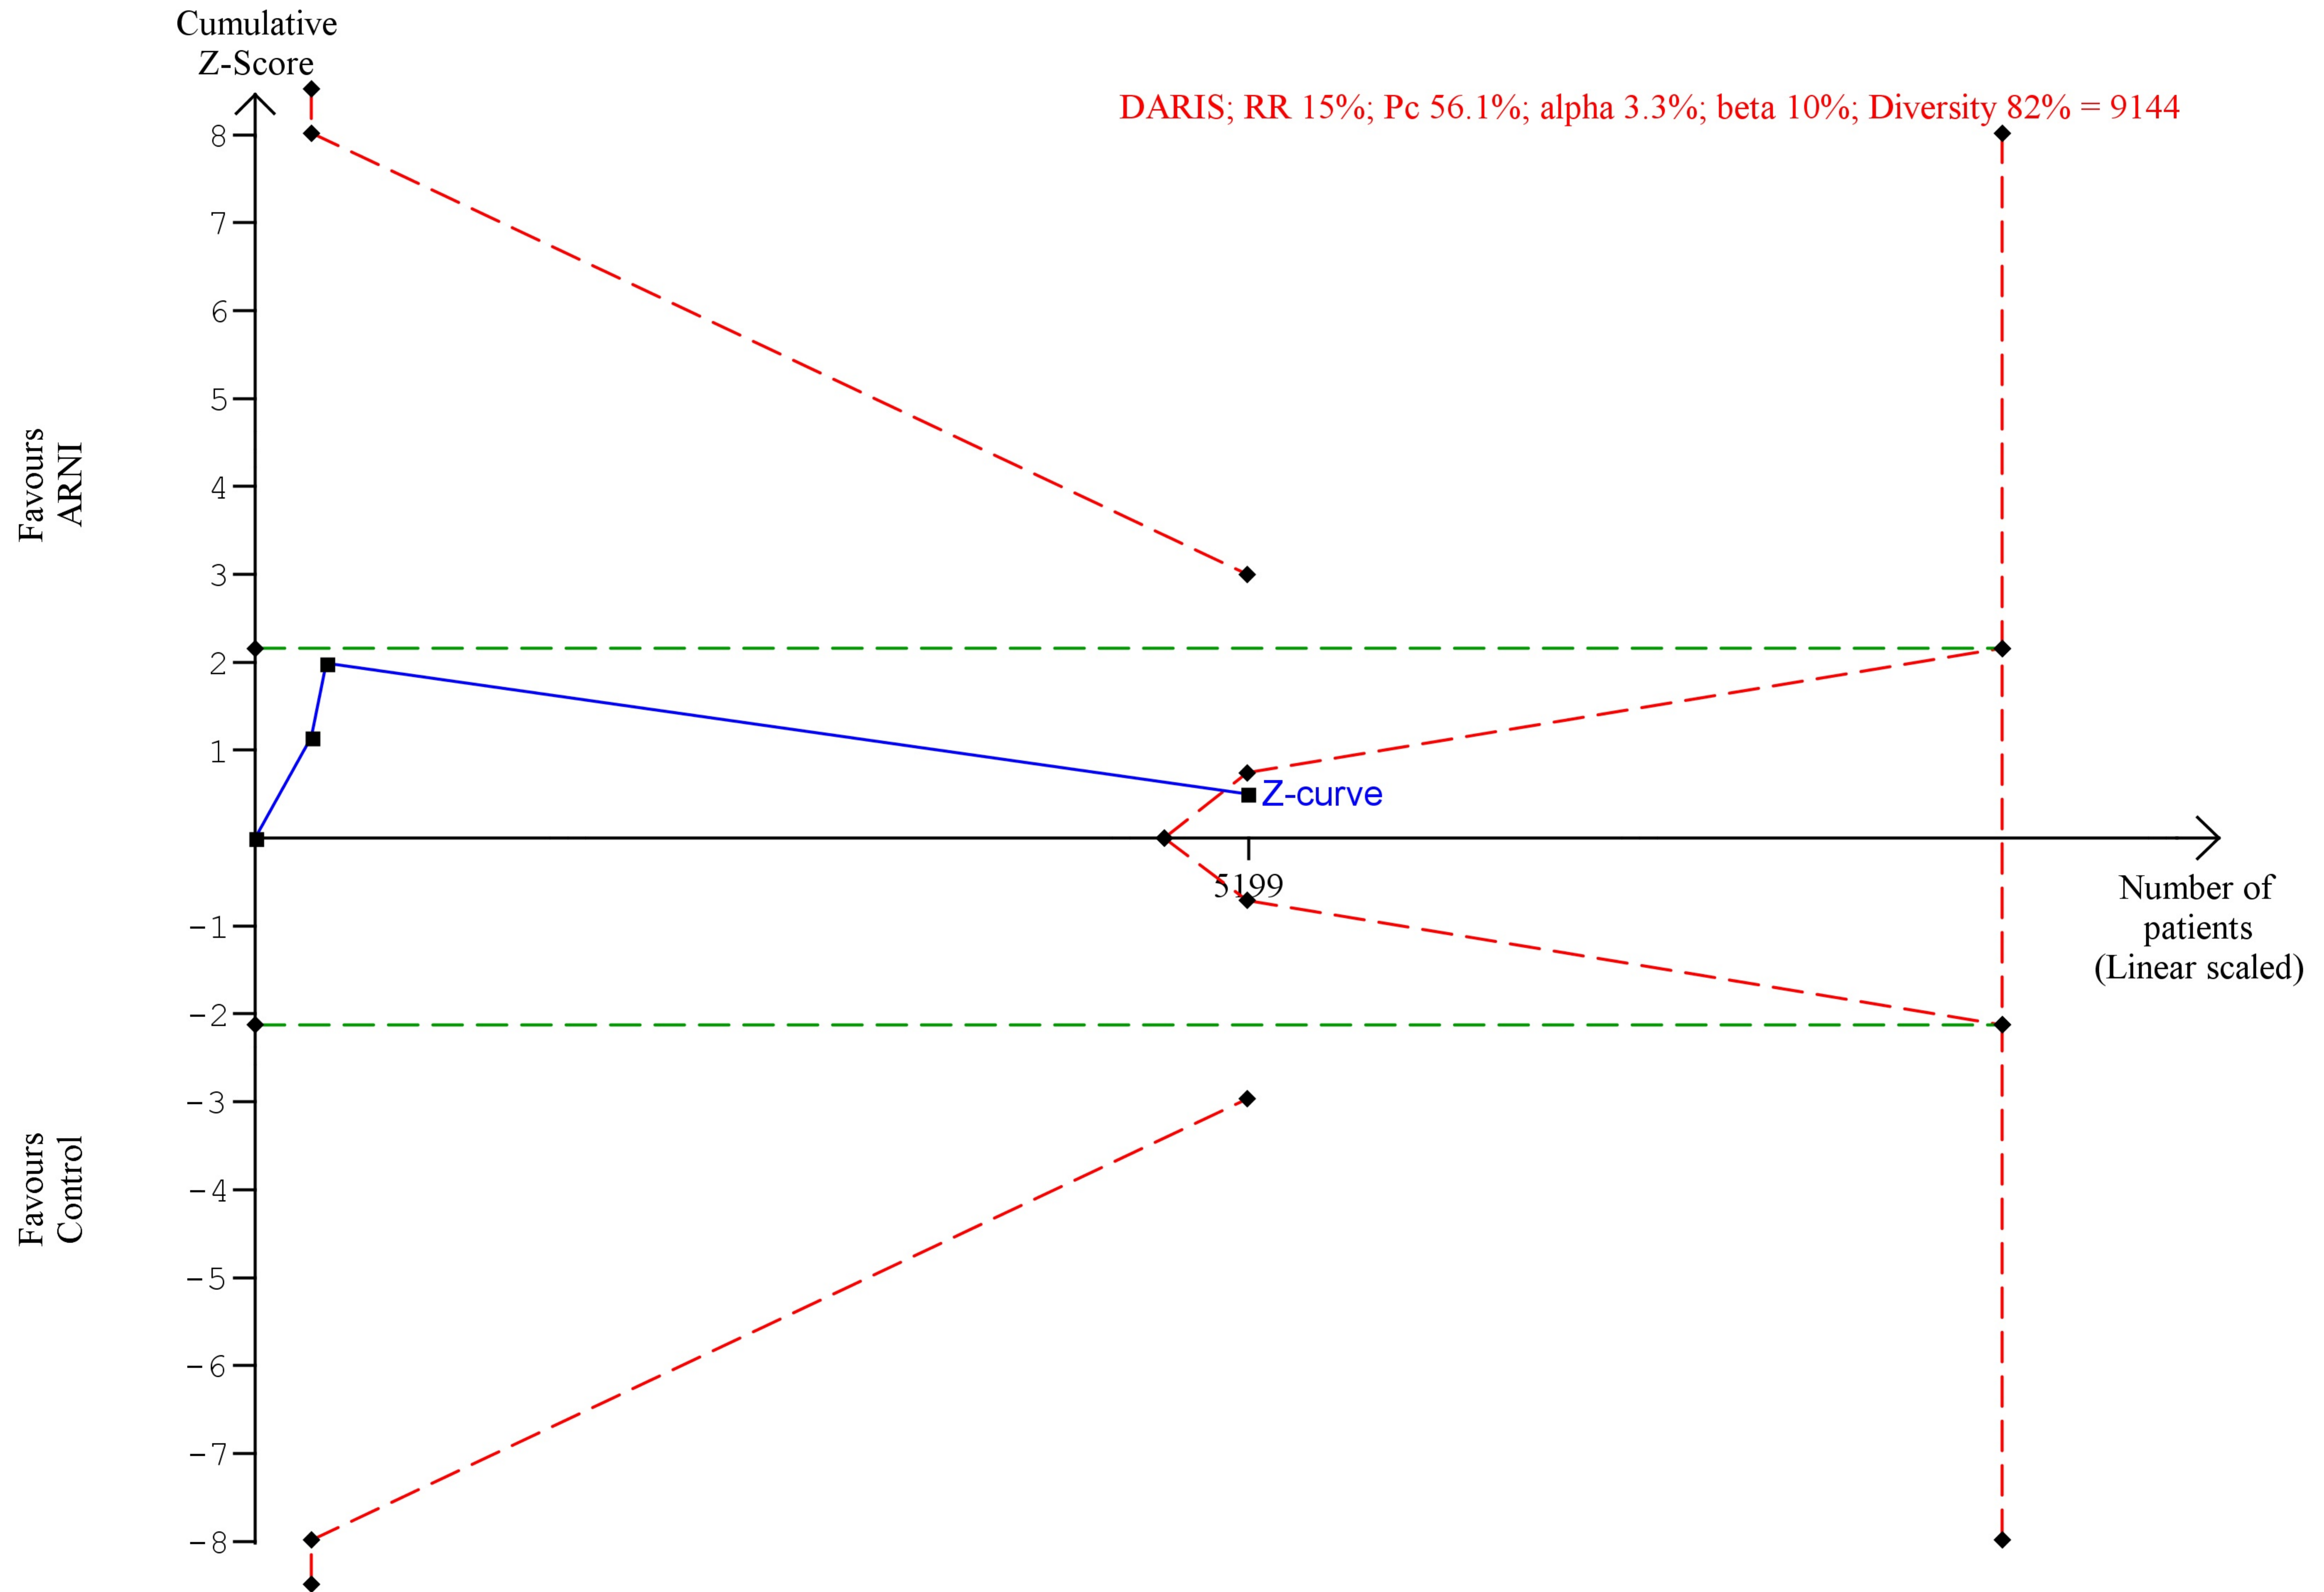

Supplement: inline-supplementary-material-46 [file inline-supplementary-material-46.pdf]

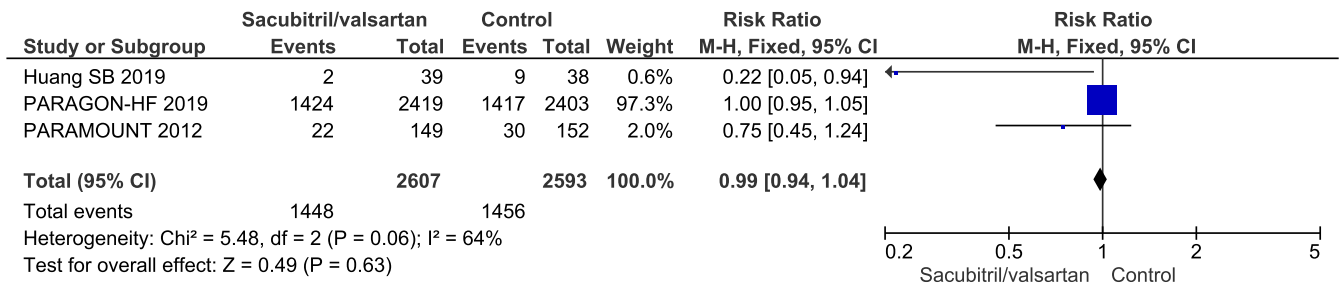

Supplement: inline-supplementary-material-47 [file inline-supplementary-material-47.pdf]

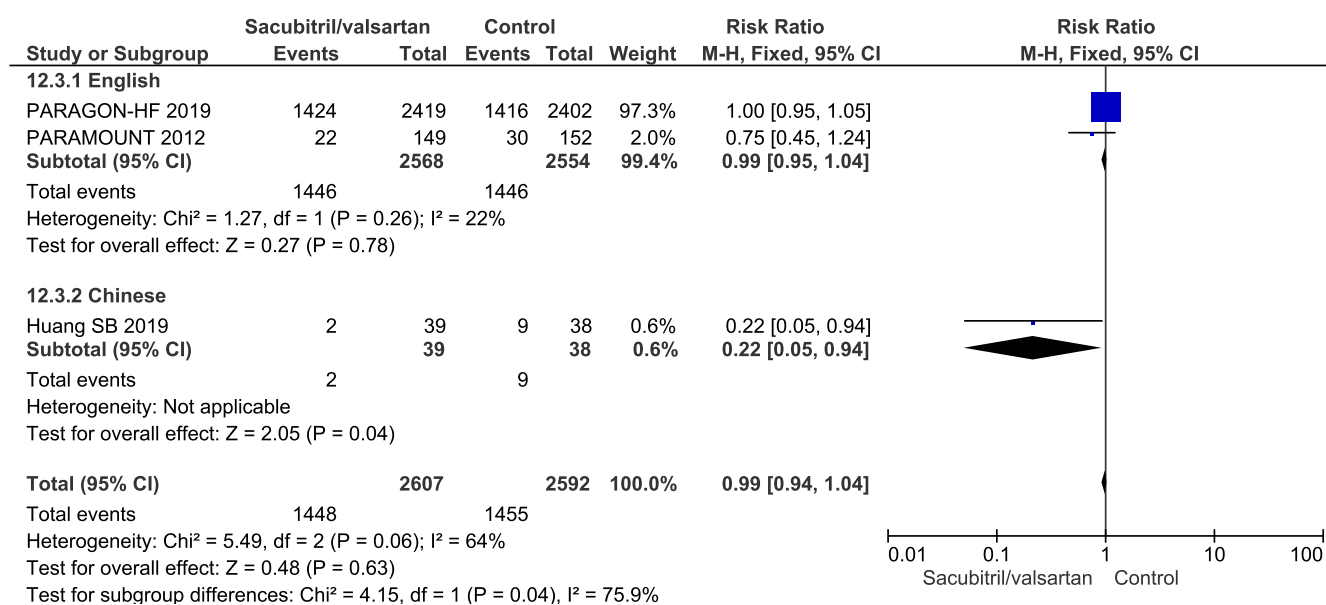

Supplement: inline-supplementary-material-48 [file inline-supplementary-material-48.pdf]

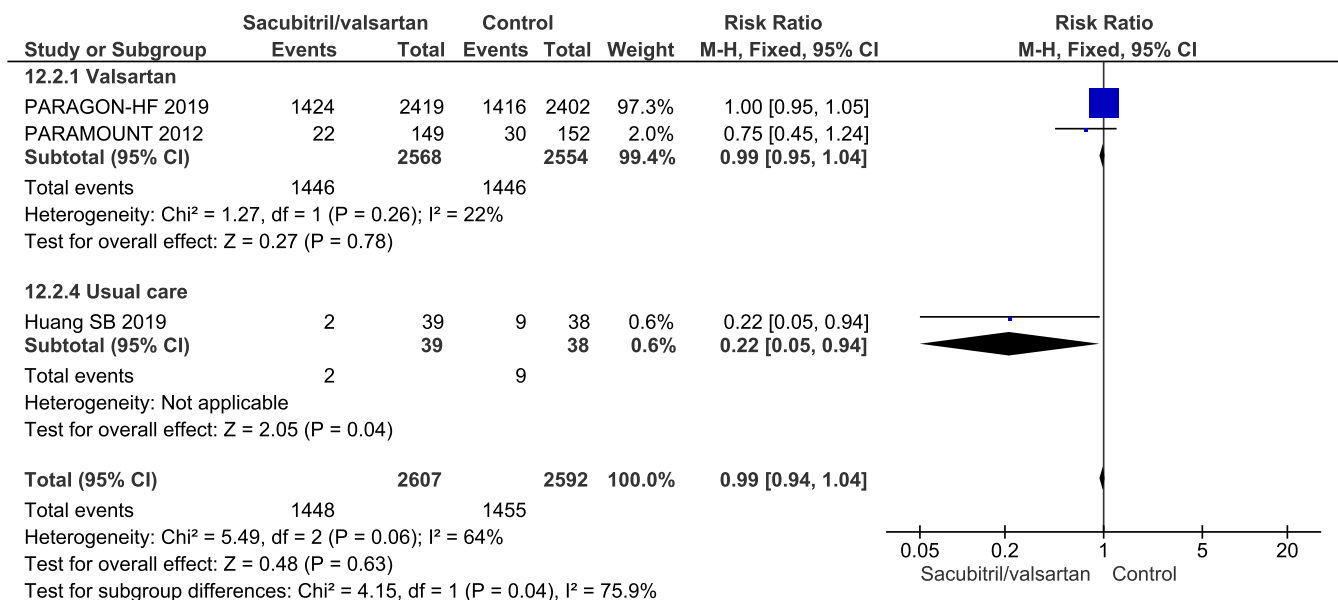

Supplement: inline-supplementary-material-49 [file inline-supplementary-material-49.pdf]

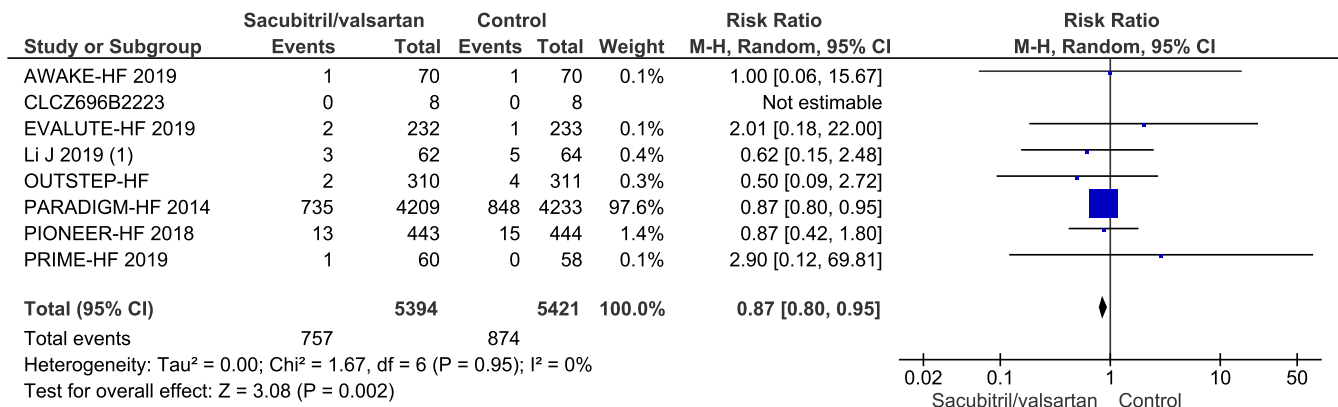

Supplement: inline-supplementary-material-5 [file inline-supplementary-material-5.pdf]

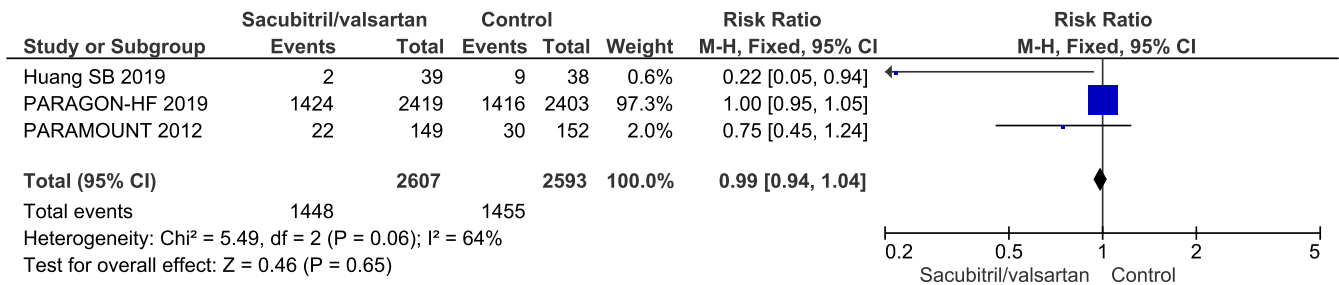

Supplement: inline-supplementary-material-50 [file inline-supplementary-material-50.pdf]

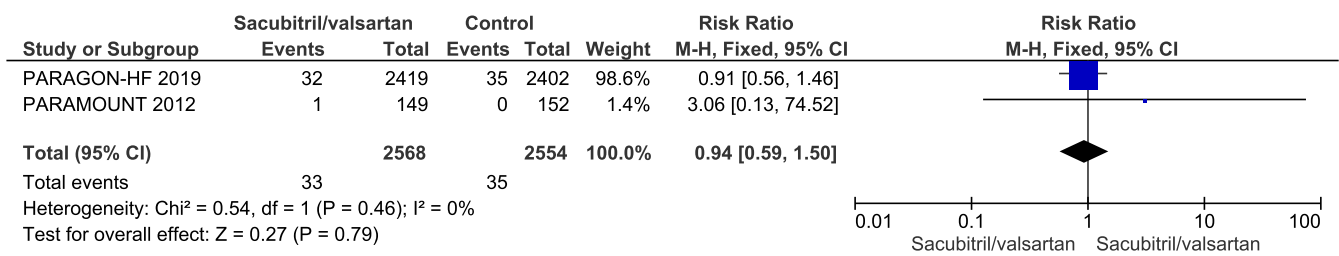

Supplement: inline-supplementary-material-51 [file inline-supplementary-material-51.pdf]

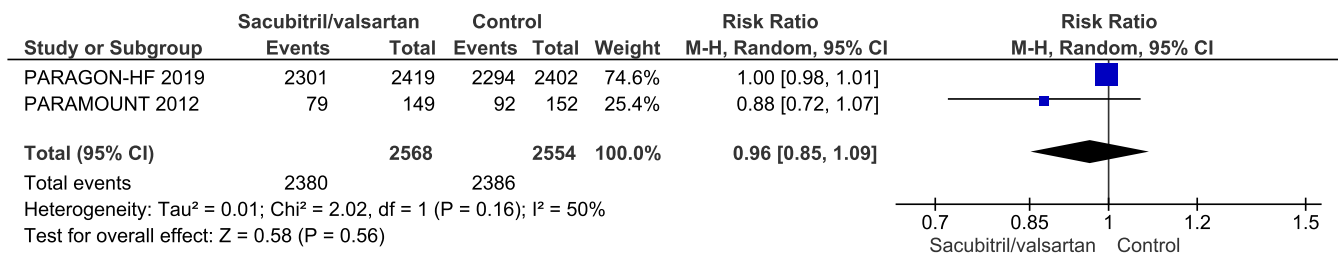

Supplement: inline-supplementary-material-52 [file inline-supplementary-material-52.pdf]

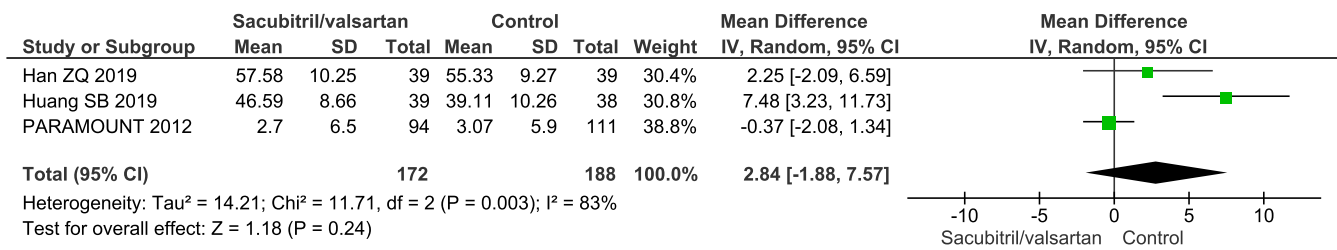

Supplement: inline-supplementary-material-53 [file inline-supplementary-material-53.pdf]

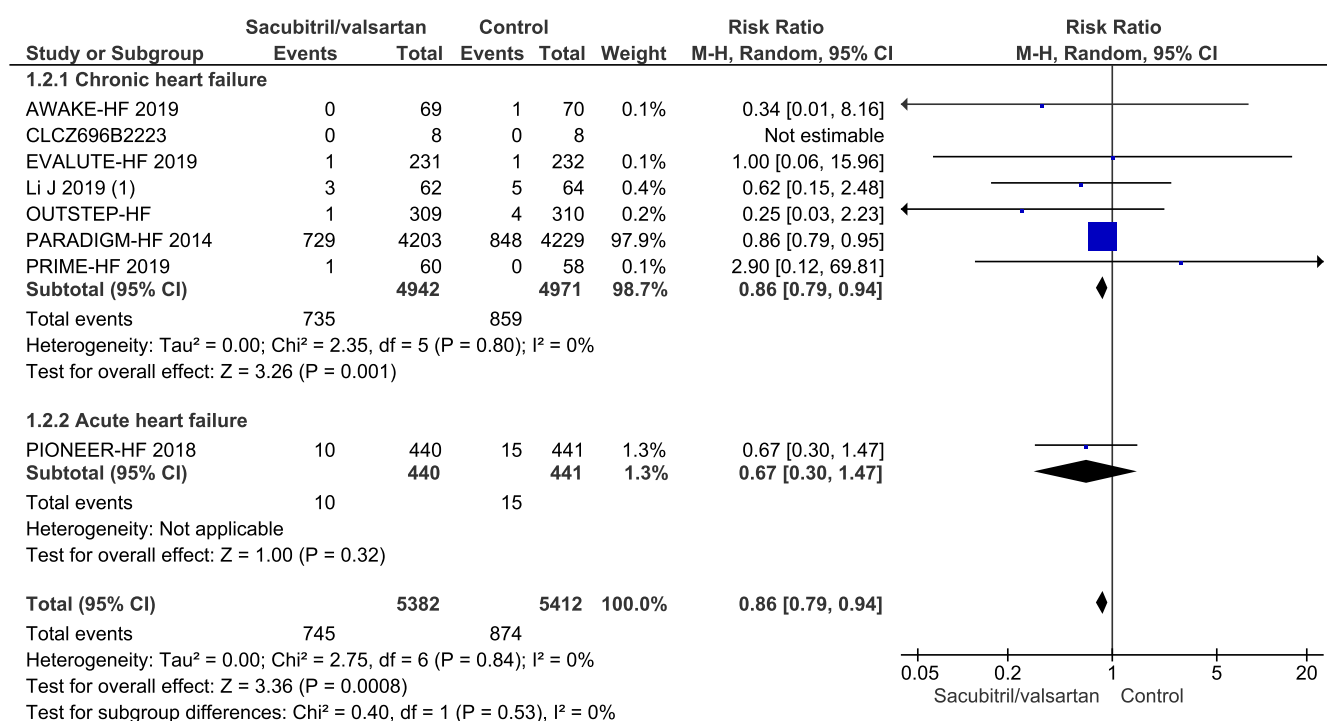

Supplement: inline-supplementary-material-6 [file inline-supplementary-material-6.pdf]

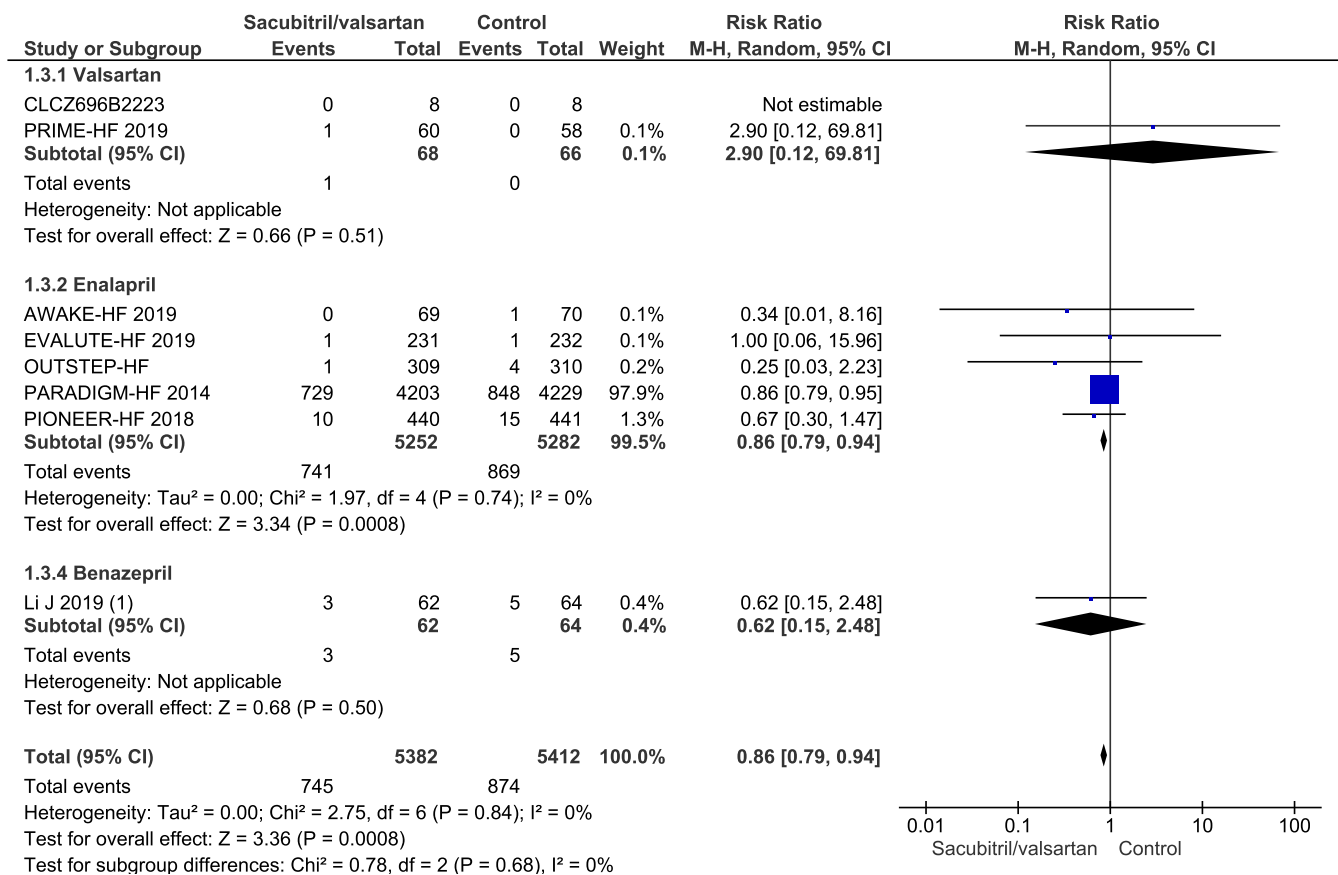

Supplement: inline-supplementary-material-7 [file inline-supplementary-material-7.pdf]

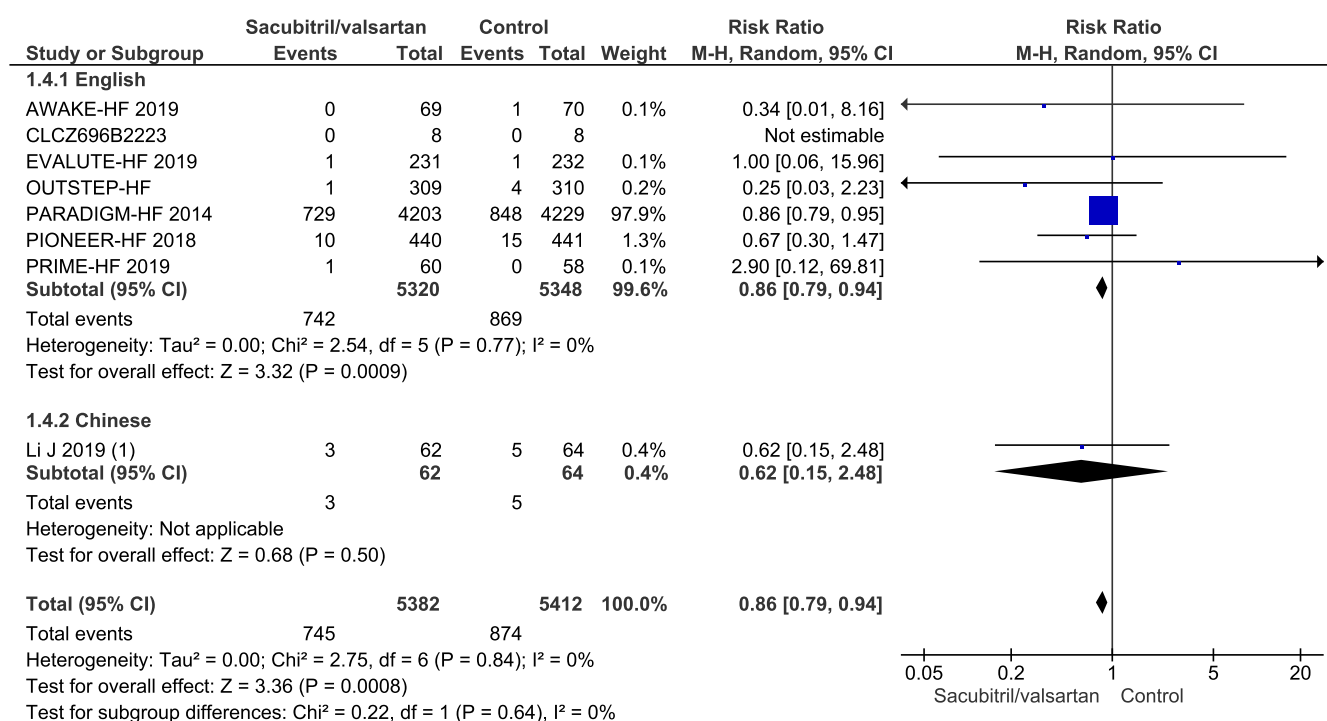

Supplement: inline-supplementary-material-8 [file inline-supplementary-material-8.pdf]

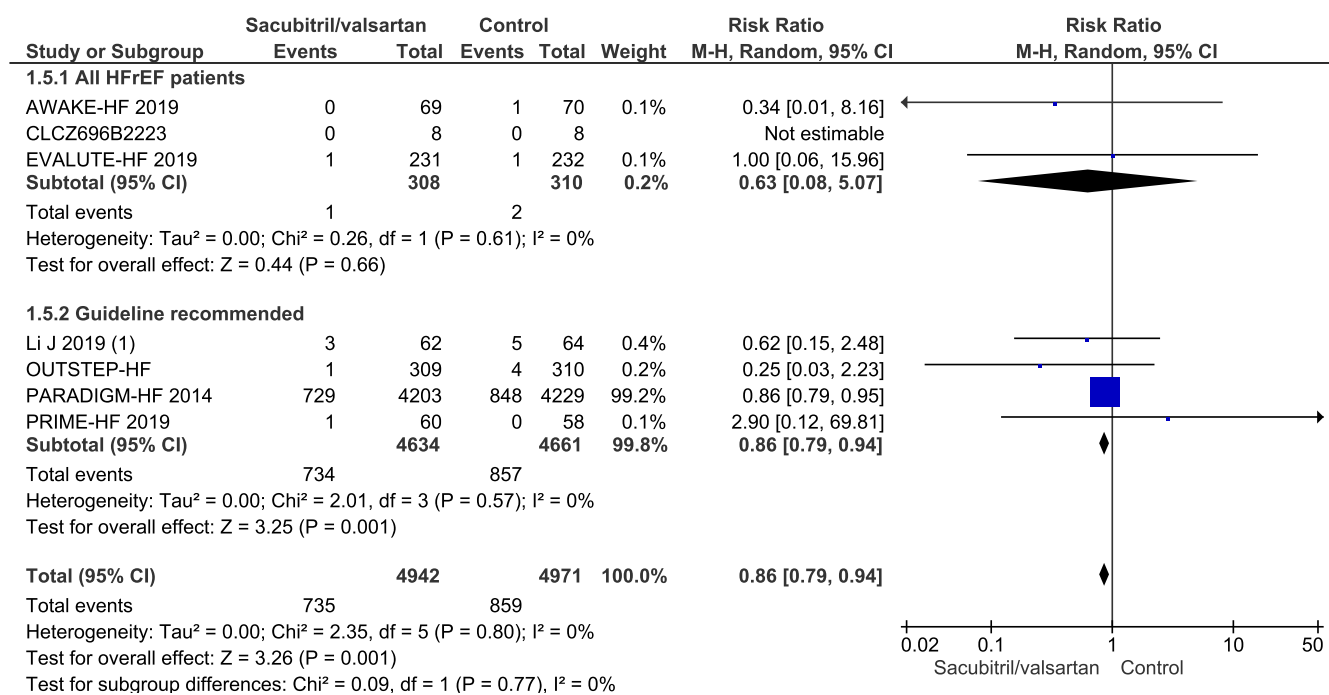

Supplement: inline-supplementary-material-9 [file inline-supplementary-material-9.pdf]
